# Supplementary material for: Testis Transcriptome Modulation in Klinefelter Patients with Hypospermatogenesis
Source: PubMed Central journal article supplement (PMC5374630; doi:10.1038/srep45729), 2017-03-31
Supplement: srep45729-s1.pdf [file srep45729-s1.pdf]

# Testis Transcriptome Modulation in Klinefelter Patients with Hypospermatogenesis

Marco D'Aurora, Alberto Ferlin, Andrea Garolla, Sara Franchi, Laura D'Onofrio, Oriana Trubiani, Giandomenico Palka, Carlo Foresta, Liborio Stuppia, Valentina Gatta

Supplementary Table S1. Down-regulated Genes in Cluster A

| ID             | Symbol  | Entrez Gene Name                                                     | Location        | Type(s)                    |
|----------------|---------|----------------------------------------------------------------------|-----------------|----------------------------|
| NM_080282.3    | ABCA10  | ATP binding cassette subfamily A member 10                           | Other           | transporter                |
| NM_080284.2    | ABCA6   | ATP binding cassette subfamily A member 6                            | Plasma Membrane | transporter                |
| NM_021160.2    | ABHD16A | abhydrolase domain containing 16A                                    | Other           | other                      |
| NM_080622.3    | ABHD16B | abhydrolase domain containing 16B                                    | Other           | other                      |
| NM_172027.2    | ABTB1   | ankyrin repeat and BTB (POZ) domain containing 1                     | Cytoplasm       | translation regulator      |
| NM_001164815.1 | ACIN1   | apoptotic chromatin condensation inducer 1                           | Nucleus         | enzyme                     |
| NM_018473.3    | ACOT13  | acyl-CoA thioesterase 13                                             | Cytoplasm       | enzyme                     |
| NM_016188.4    | ACTL6B  | actin like 6B                                                        | Nucleus         | other                      |
| NM_006687.2    | ACTL7A  | actin like 7A                                                        | Nucleus         | other                      |
| NM_006686.3    | ACTL7B  | actin like 7B                                                        | Cytoplasm       | other                      |
| NM_178525.3    | ACTL9   | actin like 9                                                         | Other           | other                      |
| NM_005736.3    | ACTR1A  | ARP1 actin-related protein 1 homolog A, centractin alpha (yeast)     | Cytoplasm       | other                      |
| NR_001569.2    | ADAM3A  | ADAM metallopeptidase domain 3A (pseudogene)                         | Other           | other                      |
| NM_014921.4    | ADGRL1  | adhesion G protein-coupled receptor L1                               | Plasma Membrane | G-protein coupled receptor |
| NM_000677.3    | ADORA3  | adenosine A3 receptor                                                | Plasma Membrane | G-protein coupled receptor |
| NM_031946.4    | AGAP3   | ArfGAP with GTPase domain, ankyrin repeat and PH domain 3            | Nucleus         | transcription regulator    |
| NM_018046.3    | AGGF1   | angiogenic factor with G-patch and FHA domains 1                     | Cytoplasm       | other                      |
| NM_001161766.1 | AHCY    | adenosylhomocysteinase                                               | Cytoplasm       | enzyme                     |
| NM_152392.3    | AHSA2   | AHA1, activator of heat shock 90kDa protein ATPase homolog 2 (yeast) | Other           | other                      |
| NM_018836.3    | AJAP1   | adherens junctions associated protein 1                              | Plasma Membrane | other                      |
| NM_032876.4    | AJUBA   | ajuba LIM protein                                                    | Nucleus         | transcription regulator    |
| NM_001625.2    | AK2     | adenylate kinase 2                                                   | Cytoplasm       | kinase                     |

|                    |               |                                                                    |                     |                         |
|--------------------|---------------|--------------------------------------------------------------------|---------------------|-------------------------|
| NM_139289.1        | AKAP4         | A-kinase anchoring protein 4                                       | Cytoplasm           | other                   |
| NM_001353.5        | AKR1C1/AKR1C2 | aldo-keto reductase family 1, member C2                            | Cytoplasm           | enzyme                  |
| NM_00101239<br>8.1 | AKTIP         | AKT interacting protein                                            | Cytoplasm           | other                   |
| NM_003888.2        | ALDH1A2       | aldehyde dehydrogenase 1 family member A2                          | Cytoplasm           | enzyme                  |
| NM_019109.4        | ALG1          | ALG1, chitobiosyldiphosphodolichol beta-mannosyltransferase        | Cytoplasm           | enzyme                  |
| NM_024079.4        | ALG8          | ALG8, alpha-1,3-glucosyltransferase                                | Cytoplasm           | enzyme                  |
| NM_032306.2        | ALKBH7        | alkB homolog 7                                                     | Cytoplasm           | other                   |
| NM_138775.2        | ALKBH8        | alkB homolog 8, tRNA methyltransferase                             | Cytoplasm           | enzyme                  |
| NM_052947.3        | ALPK2         | alpha kinase 2                                                     | Nucleus             | kinase                  |
| NM_00116759<br>5.1 | AMACR         | alpha-methylacyl-CoA racemase                                      | Cytoplasm           | enzyme                  |
| NM_00116759<br>5.1 | AMACR         | alpha-methylacyl-CoA racemase                                      | Cytoplasm           | enzyme                  |
| NM_016627.4        | AMZ2          | archaelysin family metalloproteinase 2                             | Other               | other                   |
| NM_032139.2        | ANKRD27       | ankyrin repeat domain 27                                           | Cytoplasm           | other                   |
| NM_00103988<br>8.2 | ANKRD34A      | ankyrin repeat domain 34A                                          | Cytoplasm           | other                   |
| NM_173595.3        | ANKRD52       | ankyrin repeat domain 52                                           | Nucleus             | transcription regulator |
| NM_181670.2        | ANKS1B        | ankyrin repeat and sterile alpha motif domain containing 1B        | Nucleus             | other                   |
| NM_00114564<br>6.1 | APH1B         | aph-1 homolog B, gamma secretase subunit                           | Other               | peptidase               |
| NM_032389.3        | ARFGAP2       | ADP ribosylation factor GTPase activating protein 2                | Nucleus             | other                   |
| NM_00101000<br>0.1 | ARHGAP28      | Rho GTPase activating protein 28                                   | Cytoplasm           | other                   |
| NM_004491.4        | ARHGAP35      | Rho GTPase activating protein 35                                   | Nucleus             | transcription regulator |
| NM_032496.2        | ARHGAP9       | Rho GTPase activating protein 9                                    | Cytoplasm           | other                   |
| NM_006465.2        | ARID3B        | AT-rich interaction domain 3B                                      | Nucleus             | transcription regulator |
| NM_025047.2        | ARL14         | ADP ribosylation factor like GTPase 14                             | Other               | other                   |
| NM_001667.2        | ARL2          | ADP ribosylation factor like GTPase 2                              | Cytoplasm           | enzyme                  |
| NM_025080.3        | ASRGL1        | asparaginase like 1                                                | Cytoplasm           | enzyme                  |
| NM_014109.3        | ATAD2         | ATPase family, AAA domain containing 2                             | Nucleus             | enzyme                  |
| NM_00113005<br>9.1 | ATF7          | activating transcription factor 7                                  | Nucleus             | transcription regulator |
| NM_022488.3        | ATG3          | autophagy related 3                                                | Cytoplasm           | enzyme                  |
| NM_015915.4        | ATL1          | atlastin GTPase 1                                                  | Cytoplasm           | enzyme                  |
| NM_004231.2        | ATP6V1F       | ATPase, H <sup>+</sup> transporting, lysosomal 14kDa, V1 subunit F | Cytoplasm           | enzyme                  |
| NM_004231.2        | ATP6V1F       | ATPase, H <sup>+</sup> transporting, lysosomal 14kDa, V1 subunit F | Cytoplasm           | enzyme                  |
| NM_016311.3        | ATPIF1        | ATPase inhibitory factor 1                                         | Cytoplasm           | other                   |
| NM_153340.4        | ATXN7L2       | ataxin 7-like 2                                                    | Other               | other                   |
| NM_000490.4        | AVP           | arginine vasopressin                                               | Other               | other                   |
| NM_00100541<br>7.1 | B4GALT2       | UDP-Gal:betaGlcNAc beta 1,4-galactosyltransferase, polypeptide 2   | Cytoplasm           | enzyme                  |
| NM_203314.2        | BDH1          | 3-hydroxybutyrate dehydrogenase, type 1                            | Cytoplasm           | enzyme                  |
| NR_026760.1        | BPIFA4P       | BPI fold containing family A member 4, pseudogene                  | Extracellular Space | other                   |
| NM_005104.3        | BRD2          | bromodomain containing 2                                           | Nucleus             | kinase                  |
| NM_033271.2        | BTBD6         | BTB (POZ) domain containing 6                                      | Other               | other                   |
| NM_152587.3        | C11orf65      | chromosome 11 open reading frame 65                                | Other               | other                   |

|                    |                         |                                                        |                     |                        |
|--------------------|-------------------------|--------------------------------------------------------|---------------------|------------------------|
| NM_00103722<br>5.1 | C11orf85                | chromosome 11 open reading frame 85                    | Nucleus             | other                  |
| NM_021640.3        | C12orf10                | chromosome 12 open reading frame 10                    | Nucleus             | other                  |
| NM_015492.4        | C15orf39                | chromosome 15 open reading frame 39                    | Cytoplasm           | other                  |
| NM_00101298<br>4.2 | C16orf86                | chromosome 16 open reading frame 86                    | Other               | other                  |
| NM_00114535<br>0.1 | C20orf173               | chromosome 20 open reading frame 173                   | Other               | other                  |
| NR_026933.1        | C20orf173               | chromosome 20 open reading frame 173                   | Other               | other                  |
| NM_024059.2        | C20orf195               | chromosome 20 open reading frame 195                   | Cytoplasm           | other                  |
| NM_178456.2        | C20orf85                | chromosome 20 open reading frame 85                    | Other               | other                  |
| NM_206895.1        | C2orf82                 | chromosome 2 open reading frame 82                     | Cytoplasm           | other                  |
| NM_032149.2        | C4orf17                 | chromosome 4 open reading frame 17                     | Other               | other                  |
| NM_152770.1        | C4orf22                 | chromosome 4 open reading frame 22                     | Other               | other                  |
| NM_023073.3        | C5orf42                 | chromosome 5 open reading frame 42                     | Other               | other                  |
| NM_00110260<br>9.1 | C5orf58                 | chromosome 5 open reading frame 58                     | Other               | other                  |
| NM_00100432<br>3.1 | C7orf61                 | chromosome 7 open reading frame 61                     | Nucleus             | other                  |
| NM_144654.2        | C9orf116                | chromosome 9 open reading frame 116                    | Other               | other                  |
| NM_00101094<br>0.1 | C9orf135                | chromosome 9 open reading frame 135                    | Other               | other                  |
| NM_152786.1        | C9orf43                 | chromosome 9 open reading frame 43                     | Other               | other                  |
| NM_033122.3        | CABS1                   | calcium-binding protein, spermatid-specific 1          | Extracellular Space | other                  |
| NM_138643.1        | CABYR                   | calcium binding tyrosine-(Y)-phosphorylation regulated | Cytoplasm           | other                  |
| NM_005184.2        | CALM1 (includes others) | calmodulin 1 (phosphorylase kinase, delta)             | Cytoplasm           | other                  |
| NM_138705.2        | CALML6                  | calmodulin like 6                                      | Cytoplasm           | other                  |
| NM_005632.2        | CAPN15                  | calpain 15                                             | Other               | peptidase              |
| NM_004930.3        | CAPZB                   | capping protein (actin filament) muscle Z-line, beta   | Cytoplasm           | other                  |
| NM_00104247<br>6.1 | CARHSP1                 | calcium regulated heat stable protein 1                | Cytoplasm           | other                  |
| NM_00108052<br>2.2 | CC2D2A                  | coiled-coil and C2 domain containing 2A                | Cytoplasm           | other                  |
| NM_022742.3        | CCDC136                 | coiled-coil domain containing 136                      | Cytoplasm           | other                  |
| NM_00114498<br>3.1 | CCDC169                 | coiled-coil domain containing 169                      | Other               | other                  |
| NM_00108544<br>7.1 | CCDC173                 | coiled-coil domain containing 173                      | Other               | other                  |
| NM_018017.2        | CCDC186                 | coiled-coil domain containing 186                      | Other               | other                  |
| NM_017950.2        | CCDC40                  | coiled-coil domain containing 40                       | Cytoplasm           | other                  |
| NM_144681.2        | CCDC42                  | coiled-coil domain containing 42                       | Other               | other                  |
| NM_016053.2        | CCDC53                  | coiled-coil domain containing 53                       | Cytoplasm           | other                  |
| NM_198082.2        | CCDC57                  | coiled-coil domain containing 57                       | Other               | other                  |
| NM_00108040<br>2.1 | CCDC61                  | coiled-coil domain containing 61                       | Cytoplasm           | other                  |
| NM_021825.3        | CCDC90B                 | coiled-coil domain containing 90B                      | Cytoplasm           | other                  |
| NM_003914.3        | CCNA1                   | cyclin A1                                              | Nucleus             | other                  |
| NM_004701.2        | CCNB2                   | cyclin B2                                              | Cytoplasm           | other                  |
| NM_024565.5        | CCNJL                   | cyclin J like                                          | Other               | other                  |
| NM_021147.3        | CCNO                    | cyclin O                                               | Nucleus             | enzyme                 |
| NM_181698.2        | CCNY                    | cyclin Y                                               | Nucleus             | other                  |
| NM_007053.2        | CD160                   | CD160 molecule                                         | Plasma Membrane     | transmembrane receptor |

|                |          |                                                      |                     |                         |
|----------------|----------|------------------------------------------------------|---------------------|-------------------------|
| NM_174941.4    | CD163L1  | CD163 molecule like 1                                | Plasma Membrane     | transmembrane receptor  |
| NM_016579.3    | CD320    | CD320 molecule                                       | Plasma Membrane     | other                   |
| NM_007065.3    | CDC37    | cell division cycle 37                               | Cytoplasm           | other                   |
| NM_080668.3    | CDCA5    | cell division cycle associated 5                     | Cytoplasm           | other                   |
| NM_176096.1    | CDK5RAP3 | CDK5 regulatory subunit associated protein 3         | Nucleus             | other                   |
| NM_001799.3    | CDK7     | cyclin-dependent kinase 7                            | Nucleus             | kinase                  |
| NM_005192.3    | CDKN3    | cyclin-dependent kinase inhibitor 3                  | Cytoplasm           | phosphatase             |
| NM_001029954.2 | CDNF     | cerebral dopamine neurotrophic factor                | Other               | other                   |
| NM_001802.1    | CDR2     | cerebellar degeneration related protein 2            | Cytoplasm           | other                   |
| NM_017548.4    | CDV3     | CDV3 homolog (mouse)                                 | Cytoplasm           | other                   |
| NM_024322.1    | CENPO    | centromere protein O                                 | Nucleus             | other                   |
| NM_024629.3    | CENPU    | centromere protein U                                 | Nucleus             | other                   |
| NM_014810.4    | CEP350   | centrosomal protein 350kDa                           | Cytoplasm           | other                   |
| NM_018131.4    | CEP55    | centrosomal protein 55kDa                            | Cytoplasm           | other                   |
| NM_001098802.1 | CEP78    | centrosomal protein 78kDa                            | Cytoplasm           | other                   |
| NR_003276.2    | CES1P1   | carboxylesterase 1 pseudogene 1                      | Cytoplasm           | enzyme                  |
| NM_001013625.2 | CFAP126  | cilia and flagella associated protein 126            | Other               | other                   |
| NM_207417.1    | CFAP77   | cilia and flagella associated protein 77             | Other               | other                   |
| NM_001127183.1 | CFLAR    | CASP8 and FADD like apoptosis regulator              | Cytoplasm           | other                   |
| NM_001008708.2 | CHAC2    | ChaC, cation transport regulator homolog 2 (E. coli) | Cytoplasm           | other                   |
| NM_001819.2    | CHGB     | chromogranin B                                       | Extracellular Space | other                   |
| NM_004198.2    | CHRNA6   | cholinergic receptor, nicotinic alpha 6              | Plasma Membrane     | transmembrane receptor  |
| NM_001040138.1 | CKLF     | chemokine-like factor                                | Extracellular Space | cytokine                |
| NM_001099431.1 | CLEC1B   | C-type lectin domain family 1 member B               | Plasma Membrane     | transmembrane receptor  |
| NM_207345.2    | CLEC9A   | C-type lectin domain family 9 member A               | Plasma Membrane     | other                   |
| NM_004669.2    | CLIC3    | chloride intracellular channel 3                     | Nucleus             | ion channel             |
| NM_003993.2    | CLK2     | CDC like kinase 2                                    | Nucleus             | kinase                  |
| NM_006831.2    | CLP1     | cleavage and polyadenylation factor I subunit 1      | Nucleus             | other                   |
| NM_030813.3    | CLPB     | ClpB homolog, mitochondrial AAA ATPase chaperonin    | Nucleus             | transcription regulator |
| NM_014718.3    | CLSTN3   | calsyntenin 3                                        | Plasma Membrane     | other                   |
| NM_020188.3    | CMC2     | C-x(9)-C motif containing 2                          | Cytoplasm           | other                   |
| NM_052999.3    | CMTM1    | CKLF-like MARVEL transmembrane domain containing 1   | Other               | other                   |
| NM_144673.2    | CMTM2    | CKLF-like MARVEL transmembrane domain containing 2   | Extracellular Space | cytokine                |
| NM_206999.1    | CNOT1    | CCR4-NOT transcription complex subunit 1             | Cytoplasm           | other                   |
| NM_054026.2    | CNOT7    | CCR4-NOT transcription complex subunit 7             | Nucleus             | transcription regulator |
| NM_175607.1    | CNTN4    | contactin 4                                          | Plasma Membrane     | enzyme                  |
| NM_080801.3    | COL13A1  | collagen, type XIII, alpha 1                         | Plasma Membrane     | other                   |
| NM_152516.2    | COMMD1   | copper metabolism domain containing 1                | Nucleus             | transporter             |
| NM_018405.3    | COPRS    | coordinator of PRMT5, differentiation stimulator     | Nucleus             | other                   |

|                    |          |                                                  |                     |                         |
|--------------------|----------|--------------------------------------------------|---------------------|-------------------------|
| NM_00103000<br>5.2 | CPLX3    | complexin 3                                      | Nucleus             | transporter             |
| NM_016207.2        | CPSF3    | cleavage and polyadenylation specific factor 3   | Nucleus             | enzyme                  |
| NM_00114513<br>5.1 | CPT1B    | carnitine palmitoyltransferase 1B                | Cytoplasm           | enzyme                  |
| NM_019609.4        | CPXM1    | carboxypeptidase X (M14 family), member 1        | Extracellular Space | peptidase               |
| NM_001878.2        | CRABP2   | cellular retinoic acid binding protein 2         | Cytoplasm           | transporter             |
| NM_024324.3        | CRELD2   | cysteine rich with EGF-like domains 2            | Other               | other                   |
| NM_182769.1        | CREM     | cAMP responsive element modulator                | Nucleus             | transcription regulator |
| NM_182769.1        | CREM     | cAMP responsive element modulator                | Nucleus             | transcription regulator |
| NM_153605.2        | CRYBG3   | crystallin beta-gamma domain containing 3        | Other               | other                   |
| NM_145858.2        | CRYZL1   | crystallin zeta like 1                           | Cytoplasm           | enzyme                  |
| NM_022579.1        | CSHL1    | chorionic somatomammotropin hormone like 1       | Nucleus             | transcription regulator |
| NM_022048.3        | CSNK1G1  | casein kinase 1, gamma 1                         | Cytoplasm           | kinase                  |
| NM_001319.6        | CSNK1G2  | casein kinase 1, gamma 2                         | Cytoplasm           | kinase                  |
| NM_030809.1        | CSRNP2   | cysteine-serine-rich nuclear protein 2           | Nucleus             | transcription regulator |
| NR_001279.2        | CST13P   | cystatin 13, pseudogene                          | Other               | other                   |
| NM_005492.2        | CST8     | cystatin 8                                       | Extracellular Space | other                   |
| NM_001911.2        | CTSG     | cathepsin G                                      | Cytoplasm           | peptidase               |
| NM_003591.2        | CUL2     | cullin 2                                         | Nucleus             | enzyme                  |
| NM_199168.3        | CXCL12   | chemokine (C-X-C motif) ligand 12                | Extracellular Space | cytokine                |
| NM_022059.2        | CXCL16   | chemokine (C-X-C motif) ligand 16                | Extracellular Space | cytokine                |
| NM_016229.3        | CYB5R2   | cytochrome b5 reductase 2                        | Cytoplasm           | enzyme                  |
| NM_001916.3        | CYC1     | cytochrome c-1                                   | Cytoplasm           | enzyme                  |
| NM_000773.3        | CYP2E1   | cytochrome P450 family 2 subfamily E member 1    | Cytoplasm           | enzyme                  |
| NM_004227.3        | CYTH3    | cytohesin 3                                      | Cytoplasm           | other                   |
| NM_138709.1        | DAB2IP   | DAB2 interacting protein                         | Plasma Membrane     | other                   |
| NM_178821.1        | DAW1     | dynein assembly factor with WDR repeat domains 1 | Other               | other                   |
| NR_027642.1        | DCAF13P3 | DDB1 and CUL4 associated factor 13 pseudogene 3  | Other               | other                   |
| NM_033403.1        | DCLK3    | doublecortin like kinase 3                       | Cytoplasm           | kinase                  |
| NM_020414.3        | DDX24    | DEAD-box helicase 24                             | Nucleus             | enzyme                  |
| NM_013264.3        | DDX25    | DEAD-box helicase 25                             | Nucleus             | enzyme                  |
| NM_001925.1        | DEFA4    | defensin alpha 4                                 | Extracellular Space | other                   |
| NM_00107724<br>2.1 | DEPDC7   | DEP domain containing 7                          | Cytoplasm           | other                   |
| NM_012079.4        | DGAT1    | diacylglycerol O-acyltransferase 1               | Cytoplasm           | enzyme                  |
| NM_014419.3        | DKKL1    | dickkopf-like 1                                  | Extracellular Space | other                   |
| NM_004405.3        | DLX2     | distal-less homeobox 2                           | Nucleus             | transcription regulator |
| NM_005528.3        | DNAJC4   | DnaJ heat shock protein family (Hsp40) member C4 | Cytoplasm           | other                   |
| NR_029431.1        | DNAJC7   | DnaJ heat shock protein family (Hsp40) member C7 | Cytoplasm           | other                   |
| NM_014705.3        | DOCK4    | dedicator of cytokinesis 4                       | Plasma              | other                   |

|                |                        |                                                                       |                     |                         |
|----------------|------------------------|-----------------------------------------------------------------------|---------------------|-------------------------|
|                |                        |                                                                       | Membrane            |                         |
| NM_032482.2    | DOT1L                  | DOT1-like histone H3K79 methyltransferase                             | Nucleus             | phosphatase             |
| NR_003551.1    | DPY19L2P4              | DPY19L2 pseudogene 4                                                  | Other               | other                   |
| NR_026838.1    | DSCR8                  | Down syndrome critical region 8                                       | Other               | other                   |
| NM_183360.1    | DTNB                   | dystrobrevin beta                                                     | Plasma Membrane     | other                   |
| NM_183040.1    | DTNBP1                 | dystrobrevin binding protein 1                                        | Plasma Membrane     | other                   |
| NM_004416.2    | DTX1                   | deltex 1, E3 ubiquitin ligase                                         | Nucleus             | transcription regulator |
| NM_130897.1    | DYNLRB2                | dynein, light chain, roadblock-type 2                                 | Cytoplasm           | other                   |
| NM_006483.1    | DYRK1B                 | dual specificity tyrosine-(Y)-phosphorylation regulated kinase 1B     | Nucleus             | kinase                  |
| NM_001950.3    | E2F4                   | E2F transcription factor 4, p107/p130-binding                         | Nucleus             | transcription regulator |
| NM_001077693.2 | ECSCR                  | endothelial cell surface expressed chemotaxis and apoptosis regulator | Other               | other                   |
| NM_001959.3    | EEF1B2                 | eukaryotic translation elongation factor 1 beta 2                     | Cytoplasm           | translation regulator   |
| NR_027068.1    | EFCAB10                | EF-hand calcium binding domain 10                                     | Other               | other                   |
| NM_024757.4    | EHMT1                  | euchromatic histone-lysine N-methyltransferase 1                      | Nucleus             | transcription regulator |
| NM_003751.3    | EIF3B                  | eukaryotic translation initiation factor 3 subunit B                  | Cytoplasm           | translation regulator   |
| NM_001099661.1 | EIF3CL                 | eukaryotic translation initiation factor 3 subunit C-like             | Other               | other                   |
| NM_002212.2    | EIF6                   | eukaryotic translation initiation factor 6                            | Cytoplasm           | translation regulator   |
| NM_004097.2    | EMX1                   | empty spiracles homeobox 1                                            | Nucleus             | transcription regulator |
| NM_001184937.1 | EPB41L5                | erythrocyte membrane protein band 4.1 like 5                          | Plasma Membrane     | other                   |
| NM_004447.5    | EPS8                   | epidermal growth factor receptor pathway substrate 8                  | Plasma Membrane     | peptidase               |
| NM_007277.4    | EXOC3                  | exocyst complex component 3                                           | Plasma Membrane     | transporter             |
| NM_019037.2    | EXOSC4                 | exosome component 4                                                   | Nucleus             | enzyme                  |
| NM_004456.3    | EZH2                   | enhancer of zeste 2 polycomb repressive complex 2 subunit             | Nucleus             | transcription regulator |
| NR_003698.1    | FAHD2CP                | fumarylacetoacetate hydrolase domain containing 2C, pseudogene        | Other               | other                   |
| NM_181709.3    | FAM101A/ZNF664-FAM101A | family with sequence similarity 101 member A                          | Other               | transporter             |
| NM_173698.2    | FAM133A                | family with sequence similarity 133 member A                          | Other               | other                   |
| NM_001001710.1 | FAM166A                | family with sequence similarity 166 member A                          | Nucleus             | other                   |
| NM_015091.2    | FAM179B                | family with sequence similarity 179 member B                          | Extracellular Space | other                   |
| NR_024019.1    | FAM193B                | family with sequence similarity 193 member B                          | Nucleus             | other                   |
| NM_001013646.2 | FAM209B                | family with sequence similarity 209 member B                          | Nucleus             | other                   |
| NR_027751.1    | FAM20A                 | family with sequence similarity 20 member A                           | Extracellular Space | other                   |
| NM_001077498.1 | FAM222B                | family with sequence similarity 222 member B                          | Nucleus             | other                   |
| NM_198488.3    | FAM83H                 | family with sequence similarity 83 member H                           | Other               | other                   |
| NM_001171186.1 | FAM9A                  | family with sequence similarity 9 member A                            | Nucleus             | other                   |
| NM_145235.3    | FANK1                  | fibronectin type III and ankyrin repeat domains 1                     | Nucleus             | transcription           |

|                    |          |                                                             |                     |                            |
|--------------------|----------|-------------------------------------------------------------|---------------------|----------------------------|
|                    |          |                                                             |                     | regulator                  |
| NM_00102421<br>6.1 | FBLIM1   | filamin binding LIM protein 1                               | Plasma Membrane     | other                      |
| NM_00110507<br>9.1 | FBRS     | fibrosin                                                    | Extracellular Space | cytokine                   |
| NM_024963.4        | FBXL18   | F-box and leucine-rich repeat protein 18                    | Other               | enzyme                     |
| NM_152676.2        | FBXO15   | F-box protein 15                                            | Other               | transcription regulator    |
| NM_012173.3        | FBXO25   | F-box protein 25                                            | Nucleus             | enzyme                     |
| NM_031282.2        | FCRL4    | Fc receptor-like 4                                          | Cytoplasm           | other                      |
| NM_194429.1        | FGFR1OP  | FGFR1 oncogene partner                                      | Cytoplasm           | kinase                     |
| NM_00116624<br>3.1 | FHIT     | fragile histidine triad                                     | Cytoplasm           | enzyme                     |
| NM_020482.4        | FHL5     | four and a half LIM domains 5                               | Nucleus             | transcription regulator    |
| NM_015687.2        | FILIP1   | filamin A interacting protein 1                             | Cytoplasm           | other                      |
| NM_00113493<br>7.1 | FIP1L1   | factor interacting with PAPOLA and CPSF1                    | Nucleus             | other                      |
| NM_002014.3        | FKBP4    | FK506 binding protein 4                                     | Nucleus             | enzyme                     |
| NM_152578.2        | FMR1NB   | fragile X mental retardation 1 neighbor                     | Nucleus             | other                      |
| NM_012183.2        | FOXD3    | forkhead box D3                                             | Nucleus             | transcription regulator    |
| NM_001454.3        | FOXJ1    | forkhead box J1                                             | Nucleus             | transcription regulator    |
| NM_005197.3        | FOXN3    | forkhead box N3                                             | Nucleus             | transcription regulator    |
| NM_001462.3        | FPR2     | formyl peptide receptor 2                                   | Plasma Membrane     | G-protein coupled receptor |
| NM_00101343<br>9.1 | FXR1     | fragile X mental retardation, autosomal homolog 1           | Cytoplasm           | other                      |
| NM_00112762<br>1.1 | GALE     | UDP-galactose-4-epimerase                                   | Cytoplasm           | enzyme                     |
| NM_014364.4        | GAPDHS   | glyceraldehyde-3-phosphate dehydrogenase, spermatogenic     | Cytoplasm           | enzyme                     |
| NM_182828.2        | GDF7     | growth differentiation factor 7                             | Extracellular Space | growth factor              |
| NM_030792.6        | GDPD5    | glycerophosphodiester phosphodiesterase domain containing 5 | Plasma Membrane     | enzyme                     |
| NM_015721.2        | GEMIN4   | gem nuclear organelle associated protein 4                  | Nucleus             | other                      |
| NR_024573.1        | GHDC     | GH3 domain containing                                       | Cytoplasm           | other                      |
| NM_022574.4        | GIGYF1   | GRB10 interacting GYF protein 1                             | Extracellular Space | other                      |
| NM_153236.3        | GIMAP7   | GTPase, IMAP family member 7                                | Cytoplasm           | enzyme                     |
| NM_014030.3        | GIT1     | G protein-coupled receptor kinase interacting ArfGAP 1      | Nucleus             | kinase                     |
| NM_033214.2        | GK2      | glycerol kinase 2                                           | Cytoplasm           | kinase                     |
| NM_033214.2        | GK2      | glycerol kinase 2                                           | Cytoplasm           | kinase                     |
| NM_019617.3        | GKN1     | gastrokine 1                                                | Extracellular Space | growth factor              |
| NM_005275.3        | GNL1     | guanine nucleotide binding protein-like 1                   | Nucleus             | other                      |
| NM_178331.1        | GNRH2    | gonadotropin releasing hormone 2                            | Extracellular Space | other                      |
| NR_027411.1        | GOLGA8CP | golgin A8 family member C, pseudogene                       | Other               | other                      |
| NM_004871.2        | GOSR1    | golgi SNAP receptor complex member 1                        | Cytoplasm           | transporter                |
| NM_018040.2        | GPATCH2  | G-patch domain containing 2                                 | Other               | other                      |
| NR_026735.1        | GPN1     | GPN-loop GTPase 1                                           | Nucleus             | transcription regulator    |

|                    |          |                                                                 |                         |                                  |
|--------------------|----------|-----------------------------------------------------------------|-------------------------|----------------------------------|
| NM_00108045<br>2.1 | GPR108   | G protein-coupled receptor 108                                  | Plasma<br>Membrane      | G-protein<br>coupled<br>receptor |
| NM_000273.2        | GPR143   | G protein-coupled receptor 143                                  | Plasma<br>Membrane      | G-protein<br>coupled<br>receptor |
| NM_199243.1        | GPR150   | G protein-coupled receptor 150                                  | Plasma<br>Membrane      | G-protein<br>coupled<br>receptor |
| NM_001508.2        | GPR39    | G protein-coupled receptor 39                                   | Plasma<br>Membrane      | G-protein<br>coupled<br>receptor |
| NM_198281.2        | GPRIN3   | GPRIN family member 3                                           | Other                   | other                            |
| NM_004489.4        | GPS2     | G protein pathway suppressor 2                                  | Nucleus                 | transcription<br>regulator       |
| NM_000826.3        | GRIA2    | glutamate receptor, ionotropic, AMPA 2                          | Plasma<br>Membrane      | ion channel                      |
| NM_031415.2        | GSDMC    | gasdermin C                                                     | Cytoplasm               | other                            |
| NM_001514.5        | GTF2B    | general transcription factor IIB                                | Nucleus                 | transcription<br>regulator       |
| NM_002096.2        | GTF2F1   | general transcription factor IIF subunit 1                      | Nucleus                 | transcription<br>regulator       |
| NM_012087.3        | GTF3C5   | general transcription factor IIIC subunit 5                     | Nucleus                 | transcription<br>regulator       |
| NM_144594.2        | GTSF1    | gametocyte specific factor 1                                    | Cytoplasm               | other                            |
| NM_033553.2        | GUCA2A   | guanylate cyclase activator 2A                                  | Extracellul<br>ar Space | other                            |
| NM_004130.3        | GYG1     | glycogenin 1                                                    | Cytoplasm               | enzyme                           |
| NM_181788.1        | H1FNT    | H1 histone family member N, testis specific                     | Nucleus                 | other                            |
| NM_014282.2        | HABP4    | hyaluronan binding protein 4                                    | Cytoplasm               | other                            |
| NM_014282.2        | HABP4    | hyaluronan binding protein 4                                    | Cytoplasm               | other                            |
| NM_00101091<br>5.3 | HACD4    | 3-hydroxyacyl-CoA dehydratase 4                                 | Cytoplasm               | enzyme                           |
| NM_033647.2        | HELB     | helicase (DNA) B                                                | Nucleus                 | enzyme                           |
| NM_022079.2        | HERC4    | HECT and RLD domain containing E3 ubiquitin<br>protein ligase 4 | Cytoplasm               | enzyme                           |
| NM_152419.2        | HGSNAT   | heparan-alpha-glucosaminide N-acetyltransferase                 | Cytoplasm               | enzyme                           |
| NM_022462.3        | HIF3A    | hypoxia inducible factor 3, alpha subunit                       | Nucleus                 | transcription<br>regulator       |
| NM_003542.3        | HIST1H4C | histone cluster 1, H4c                                          | Nucleus                 | other                            |
| NM_175054.2        | HIST4H4  | histone cluster 4, H4                                           | Nucleus                 | other                            |
| NM_033496.2        | HK1      | hexokinase 1                                                    | Cytoplasm               | kinase                           |
| NM_025130.3        | HKDC1    | hexokinase domain containing 1                                  | Other                   | kinase                           |
| NR_024240.1        | HLA-J    | major histocompatibility complex, class I, J<br>(pseudogene)    | Other                   | other                            |
| NM_020187.2        | HMCES    | 5-hydroxymethylcytosine (hmC) binding, ES<br>cell-specific      | Other                   | other                            |
| NM_016185.2        | HN1      | hematological and neurological expressed 1                      | Nucleus                 | other                            |
| NM_152510.2        | HORMAD2  | HORMA domain containing 2                                       | Nucleus                 | other                            |
| NM_020386.3        | HRASLS   | HRAS-like suppressor                                            | Cytoplasm               | enzyme                           |
| NM_021979.3        | HSPA2    | heat shock protein family A (Hsp70) member 2                    | Cytoplasm               | other                            |
| NM_00103961<br>3.1 | IAH1     | isoamyl acetate-hydrolyzing esterase 1 homolog                  | Cytoplasm               | other                            |
| NM_138468.4        | ICA1L    | islet cell autoantigen 1 like                                   | Other                   | other                            |
| NM_006546.3        | IGF2BP1  | insulin like growth factor 2 mRNA binding<br>protein 1          | Cytoplasm               | translation<br>regulator         |
| NM_00100292<br>3.1 | IGFL4    | IGF like family member 4                                        | Extracellul<br>ar Space | other                            |



|                |           |                                                                        |                     |                         |
|----------------|-----------|------------------------------------------------------------------------|---------------------|-------------------------|
| NM_003856.2    | IL1RL1    | interleukin 1 receptor like 1                                          | Plasma Membrane     | transmembrane receptor  |
| NM_000588.3    | IL3       | interleukin 3                                                          | Extracellular Space | cytokine                |
| NM_172374.1    | IL4I1     | interleukin 4 induced 1                                                | Cytoplasm           | enzyme                  |
| NM_001128928.1 | INPP1     | inositol polyphosphate-1-phosphatase                                   | Cytoplasm           | phosphatase             |
| NM_003866.2    | INPP4B    | inositol polyphosphate-4-phosphatase type II B                         | Cytoplasm           | phosphatase             |
| NM_017864.2    | INTS8     | integrator complex subunit 8                                           | Nucleus             | other                   |
| NM_016291.2    | IP6K2     | inositol hexakisphosphate kinase 2                                     | Cytoplasm           | kinase                  |
| NM_014652.3    | IPO13     | importin 13                                                            | Nucleus             | transporter             |
| NM_152397.2    | IQCF1     | IQ motif containing F1                                                 | Cytoplasm           | other                   |
| NM_004136.2    | IREB2     | iron responsive element binding protein 2                              | Cytoplasm           | translation regulator   |
| NM_080826.1    | ISM1      | isthmin 1, angiogenesis inhibitor                                      | Other               | other                   |
| NM_002227.2    | JAK1      | Janus kinase 1                                                         | Cytoplasm           | kinase                  |
| NM_005472.4    | KCNE3     | potassium channel, voltage gated subfamily E regulatory beta subunit 3 | Plasma Membrane     | ion channel             |
| NM_000238.2    | KCNH2     | potassium channel, voltage gated eag related subfamily H, member 2     | Plasma Membrane     | ion channel             |
| NM_000891.2    | KCNJ2     | potassium channel, inwardly rectifying subfamily J, member 2           | Plasma Membrane     | ion channel             |
| NM_004823.1    | KCNK6     | potassium channel, two pore domain subfamily K, member 6               | Plasma Membrane     | ion channel             |
| NM_007035.3    | KERA      | keratocan                                                              | Extracellular Space | other                   |
| NM_014773.3    | KIAA0141  | KIAA0141                                                               | Cytoplasm           | other                   |
| NM_001099294.1 | KIAA1644  | KIAA1644                                                               | Other               | other                   |
| NM_194313.2    | KIF24     | kinesin family member 24                                               | Cytoplasm           | other                   |
| NM_004521.2    | KIF5B     | kinesin family member 5B                                               | Cytoplasm           | other                   |
| NM_001130100.1 | KIFC3     | kinesin family member C3                                               | Cytoplasm           | enzyme                  |
| NM_001163023.1 | KIZ       | kizuna centrosomal protein                                             | Cytoplasm           | other                   |
| NM_001134775.1 | KLC2      | kinesin light chain 2                                                  | Cytoplasm           | other                   |
| NM_138693.2    | KLF14     | Kruppel-like factor 14                                                 | Nucleus             | other                   |
| NM_001160124.1 | KLF6      | Kruppel-like factor 6                                                  | Nucleus             | transcription regulator |
| NM_057161.2    | KLHDC3    | kelch domain containing 3                                              | Cytoplasm           | other                   |
| NM_152366.4    | KLHDC9    | kelch domain containing 9                                              | Other               | other                   |
| NM_032775.2    | KLHL22    | kelch like family member 22                                            | Cytoplasm           | other                   |
| NM_006063.2    | KLHL41    | kelch like family member 41                                            | Cytoplasm           | other                   |
| NM_004917.3    | KLK4      | kallikrein related peptidase 4                                         | Extracellular Space | peptidase               |
| NM_016523.1    | KLRF1     | killer cell lectin like receptor F1                                    | Plasma Membrane     | transmembrane receptor  |
| NM_001097611.1 | KNCN      | kinocilin                                                              | Cytoplasm           | other                   |
| NM_001142762.1 | KNSTRN    | kinetochore-localized astrin/SPAG5 binding protein                     | Cytoplasm           | other                   |
| NM_002266.2    | KPNA2     | karyopherin alpha 2 (RAG cohort 1, importin alpha 1)                   | Nucleus             | transporter             |
| NM_181615.1    | KRTAP20-1 | keratin associated protein 20-1                                        | Other               | other                   |
| NM_014238.1    | KSR1      | kinase suppressor of ras 1                                             | Cytoplasm           | kinase                  |
| NM_006762.2    | LAPTM5    | lysosomal protein transmembrane 5                                      | Plasma Membrane     | other                   |

|                    |                                |                                                                          |                    |                            |
|--------------------|--------------------------------|--------------------------------------------------------------------------|--------------------|----------------------------|
| NM_002296.2        | LBR                            | lamin B receptor                                                         | Nucleus            | enzyme                     |
| NM_005565.3        | LCP2                           | lymphocyte cytosolic protein 2                                           | Cytoplasm          | other                      |
| NM_033195.1        | LDHAL6B                        | lactate dehydrogenase A-like 6B                                          | Cytoplasm          | enzyme                     |
| NM_002301.4        | LDHC                           | lactate dehydrogenase C                                                  | Cytoplasm          | enzyme                     |
| NM_00101085<br>7.1 | LELP1                          | late cornified envelope-like proline-rich 1                              | Other              | other                      |
| NM_020129.2        | LGALS14                        | lectin, galactoside-binding, soluble, 14                                 | Nucleus            | other                      |
| NM_00100193<br>3.1 | LHX8                           | LIM homeobox 8                                                           | Nucleus            | transcription<br>regulator |
| NM_00100431<br>7.2 | LIN28B                         | lin-28 homolog B (C. elegans)                                            | Cytoplasm          | other                      |
| NM_194282.2        | LIN54                          | lin-54 DREAM MuvB core complex component                                 | Nucleus            | other                      |
| NR_024347.1        | LINC00304                      | long intergenic non-protein coding RNA 304                               | Other              | other                      |
| NR_026761.2        | LINC00467                      | long intergenic non-protein coding RNA 467                               | Other              | other                      |
| NR_026761.2        | LINC00467                      | long intergenic non-protein coding RNA 467                               | Other              | other                      |
| NR_028326.1        | LINC01001<br>(includes others) | long intergenic non-protein coding RNA 1347                              | Other              | other                      |
| NM_152590.2        | LMNTD1                         | lamin tail domain containing 1                                           | Nucleus            | other                      |
| NM_00108545<br>1.1 | LNP1                           | leukemia NUP98 fusion partner 1                                          | Other              | other                      |
| XM_00171666<br>9.2 | LOC100131347                   | RAD52 motif containing 1 pseudogene                                      | Other              | other                      |
| NR_024264.1        | LOC145845                      | uncharacterized LOC145845                                                | Other              | other                      |
| NR_028335.1        | LOC284009                      | uncharacterized LOC284009                                                | Other              | other                      |
| NR_015361.1        | LOC440896                      | uncharacterized LOC440896                                                | Other              | other                      |
| NM_024036.4        | LRFN4                          | leucine rich repeat and fibronectin type III<br>domain containing 4      | Plasma<br>Membrane | other                      |
| NM_024036.4        | LRFN4                          | leucine rich repeat and fibronectin type III<br>domain containing 4      | Plasma<br>Membrane | other                      |
| NM_018214.4        | LRRC1                          | leucine rich repeat containing 1                                         | Cytoplasm          | other                      |
| XM_059074.6        | LRRC38                         | leucine rich repeat containing 38                                        | Other              | other                      |
| NM_144620.2        | LRRC39                         | leucine rich repeat containing 39                                        | Other              | other                      |
| NM_00113755<br>1.1 | LRRFIP1                        | leucine rich repeat (in FLII) interacting protein 1                      | Cytoplasm          | other                      |
| NM_00110565<br>9.1 | LRRIQ3                         | leucine-rich repeats and IQ motif containing 3                           | Other              | other                      |
| NR_026886.1        | LRTOMT                         | leucine rich transmembrane and O-<br>methyltransferase domain containing | Other              | enzyme                     |
| NM_00114572<br>5.1 | LYAR                           | Ly1 antibody reactive                                                    | Plasma<br>Membrane | other                      |
| NM_173506.4        | LYPD4                          | LY6/PLAUR domain containing 4                                            | Other              | other                      |
| NM_00116484<br>0.1 | LYRM4                          | LYR motif containing 4                                                   | Cytoplasm          | other                      |
| NM_020408.4        | LYRM4                          | LYR motif containing 4                                                   | Cytoplasm          | other                      |
| NM_00100166<br>0.2 | LYRM5                          | LYR motif containing 5                                                   | Cytoplasm          | other                      |
| NM_005366.4        | MAGEA11                        | MAGE family member A11                                                   | Nucleus            | other                      |
| NM_006699.3        | MAN1A2                         | mannosidase, alpha, class 1A, member 2                                   | Cytoplasm          | enzyme                     |
| NM_006609.3        | MAP3K2                         | mitogen-activated protein kinase kinase kinase 2                         | Cytoplasm          | kinase                     |
| NM_020152.2        | MAP3K7CL                       | MAP3K7 C-terminal like                                                   | Other              | other                      |
| NM_024871.2        | MAP6D1                         | MAP6 domain containing 1                                                 | Cytoplasm          | other                      |
| NM_002748.3        | MAPK6                          | mitogen-activated protein kinase 6                                       | Cytoplasm          | kinase                     |
| NM_138396.4        | MARCH9                         | membrane associated ring-CH-type finger 9                                | Cytoplasm          | other                      |
| NM_032844.3        | MASTL                          | microtubule associated serine/threonine kinase<br>like                   | Cytoplasm          | kinase                     |
| NM_138799.2        | MBOAT2                         | membrane bound O-acyltransferase domain<br>containing 2                  | Cytoplasm          | enzyme                     |

|                    |           |                                                                 |                     |                         |
|--------------------|-----------|-----------------------------------------------------------------|---------------------|-------------------------|
| NM_00114608<br>3.1 | MBOAT7    | membrane bound O-acyltransferase domain containing 7            | Plasma Membrane     | other                   |
| NM_00101170<br>0.2 | MCCD1     | mitochondrial coiled-coil domain 1                              | Other               | other                   |
| NM_014623.2        | MEA1      | male-enhanced antigen 1                                         | Cytoplasm           | other                   |
| NM_015889.3        | MED15     | mediator complex subunit 15                                     | Nucleus             | transcription regulator |
| NM_133640.3        | MED22     | mediator complex subunit 22                                     | Cytoplasm           | other                   |
| NM_015143.2        | METAP1    | methionyl aminopeptidase 1                                      | Cytoplasm           | peptidase               |
| NM_00104322<br>9.1 | METTL12   | methyltransferase like 12                                       | Cytoplasm           | other                   |
| NM_00108051<br>0.2 | METTL23   | methyltransferase like 23                                       | Other               | other                   |
| NM_032230.2        | METTL25   | methyltransferase like 25                                       | Extracellular Space | other                   |
| NM_019852.3        | METTL3    | methyltransferase like 3                                        | Nucleus             | enzyme                  |
| NM_152599.3        | MFSD6L    | major facilitator superfamily domain containing 6-like          | Other               | other                   |
| NM_013446.3        | MKRN1     | makorin ring finger protein 1                                   | Other               | enzyme                  |
| NM_000249.3        | MLH1      | mutL homolog 1                                                  | Nucleus             | enzyme                  |
| NM_00100956<br>9.1 | MLLT10    | myeloid/lymphoid or mixed-lineage leukemia; translocated to, 10 | Nucleus             | transcription regulator |
| NM_00104000<br>1.1 | MLLT4     | myeloid/lymphoid or mixed-lineage leukemia; translocated to, 4  | Nucleus             | other                   |
| NM_002424.2        | MMP8      | matrix metalloproteinase 8                                      | Extracellular Space | peptidase               |
| NM_005515.3        | MNX1      | motor neuron and pancreas homeobox 1                            | Nucleus             | transcription regulator |
| NR_003090.1        | MOBP      | myelin-associated oligodendrocyte basic protein                 | Cytoplasm           | other                   |
| NM_006792.2        | MORF4     | mortality factor 4 (pseudogene)                                 | Nucleus             | transcription regulator |
| NM_00114545<br>0.1 | MORN2     | MORN repeat containing 2                                        | Other               | other                   |
| NM_173855.4        | MORN3     | MORN repeat containing 3                                        | Nucleus             | other                   |
| NM_004870.3        | MPDU1     | mannose-P-dolichol utilization defect 1                         | Cytoplasm           | other                   |
| NM_198275.1        | MPZL3     | myelin protein zero-like 3                                      | Other               | other                   |
| NM_032111.2        | MRPL14    | mitochondrial ribosomal protein L14                             | Cytoplasm           | other                   |
| NM_024026.4        | MRPL57    | mitochondrial ribosomal protein L57                             | Cytoplasm           | other                   |
| NM_176805.1        | MRPS11    | mitochondrial ribosomal protein S11                             | Cytoplasm           | other                   |
| NM_031280.3        | MRPS15    | mitochondrial ribosomal protein S15                             | Cytoplasm           | other                   |
| NM_031280.3        | MRPS15    | mitochondrial ribosomal protein S15                             | Cytoplasm           | other                   |
| NM_020191.2        | MRPS22    | mitochondrial ribosomal protein S22                             | Cytoplasm           | other                   |
| XM_00171632<br>6.2 | MRVI1-AS1 | MRVI1 antisense RNA 1                                           | Other               | other                   |
| NM_148975.1        | MS4A4A    | membrane-spanning 4-domains subfamily A member 4A               | Cytoplasm           | other                   |
| NM_023945.2        | MS4A5     | membrane-spanning 4-domains subfamily A member 5                | Other               | other                   |
| NM_020998.3        | MST1      | macrophage stimulating 1                                        | Extracellular Space | growth factor           |
| NM_014342.3        | MTCH2     | mitochondrial carrier 2                                         | Cytoplasm           | other                   |
| NM_00103965<br>6.1 | MTL5      | metallothionein-like 5, testis-specific (tesmin)                | Cytoplasm           | other                   |
| NM_004687.4        | MTMR4     | myotubularin related protein 4                                  | Cytoplasm           | phosphatase             |
| NM_002471.3        | MYH6      | myosin, heavy chain 6, cardiac muscle, alpha                    | Cytoplasm           | enzyme                  |
| NM_004145.3        | MYO9B     | myosin IXB                                                      | Cytoplasm           | enzyme                  |
| NM_181527.2        | NAA20     | N(alpha)-acetyltransferase 20, NatB catalytic subunit           | Cytoplasm           | enzyme                  |

|                    |                          |                                                                   |                     |                                   |
|--------------------|--------------------------|-------------------------------------------------------------------|---------------------|-----------------------------------|
| NM_032356.3        | NAA38                    | N(alpha)-acetyltransferase 38, NatC auxiliary subunit             | Nucleus             | other                             |
| NM_024068.3        | NABP2                    | nucleic acid binding protein 2                                    | Nucleus             | other                             |
| NM_00111320<br>1.1 | NACA                     | nascent polypeptide-associated complex alpha subunit              | Cytoplasm           | transcription regulator           |
| NM_197956.3        | NAIF1                    | nuclear apoptosis inducing factor 1                               | Nucleus             | other                             |
| NM_003826.2        | NAPG                     | N-ethylmaleimide-sensitive factor attachment protein, gamma       | Cytoplasm           | transporter                       |
| NM_00110266<br>3.1 | NBPF15 (includes others) | neuroblastoma breakpoint family member 15                         | Other               | other                             |
| NM_00107668<br>2.2 | NCAM1                    | neural cell adhesion molecule 1                                   | Plasma Membrane     | other                             |
| NM_014865.3        | NCAPD2                   | non-SMC condensin I complex subunit D2                            | Nucleus             | other                             |
| NM_174889.4        | NDUFAF2                  | NADH:ubiquinone oxidoreductase complex assembly factor 2          | Cytoplasm           | enzyme                            |
| NM_182966.3        | NEDD9                    | neural precursor cell expressed, developmentally down-regulated 9 | Nucleus             | other                             |
| NM_002904.5        | NELFE                    | negative elongation factor complex member E                       | Nucleus             | other                             |
| NR_026598.1        | NENF                     | neudesin neurotrophic factor                                      | Extracellular Space | growth factor                     |
| NM_022728.2        | NEUROD6                  | neuronal differentiation 6                                        | Nucleus             | transcription regulator           |
| NM_002507.3        | NGFR                     | nerve growth factor receptor                                      | Plasma Membrane     | transmembrane receptor            |
| NM_024894.2        | NOL10                    | nucleolar protein 10                                              | Nucleus             | other                             |
| NM_022917.4        | NOL6                     | nucleolar protein 6                                               | Nucleus             | other                             |
| NM_00113010<br>2.1 | NR1H3                    | nuclear receptor subfamily 1 group H member 3                     | Nucleus             | ligand-dependent nuclear receptor |
| NM_00110166<br>2.1 | NRDC                     | nardilysin convertase                                             | Cytoplasm           | peptidase                         |
| NM_00104011<br>0.1 | NRF1                     | nuclear respiratory factor 1                                      | Nucleus             | transcription regulator           |
| NM_022455.4        | NSD1                     | nuclear receptor binding SET domain protein 1                     | Nucleus             | transcription regulator           |
| NM_145080.3        | NSMCE1                   | NSE1 homolog, SMC5-SMC6 complex component                         | Nucleus             | transporter                       |
| NM_033253.2        | NT5C1B                   | 5'-nucleotidase, cytosolic IB                                     | Cytoplasm           | phosphatase                       |
| NM_152729.2        | NT5DC1                   | 5'-nucleotidase domain containing 1                               | Other               | other                             |
| NM_173474.2        | NTAN1                    | N-terminal asparagine amidase                                     | Nucleus             | enzyme                            |
| NM_006179.4        | NTF4                     | neurotrophin 4                                                    | Extracellular Space | growth factor                     |
| NM_014064.2        | NTMT1                    | N-terminal Xaa-Pro-Lys N-methyltransferase 1                      | Nucleus             | enzyme                            |
| NM_005085.2        | NUP214                   | nucleoporin 214kDa                                                | Nucleus             | transporter                       |
| NM_007342.2        | NUPL2                    | nucleoporin like 2                                                | Nucleus             | transporter                       |
| NM_00114571<br>2.1 | NUPR2                    | nuclear protein 2, transcriptional regulator                      | Nucleus             | other                             |
| NM_00113493<br>9.1 | OAZ3                     | ornithine decarboxylase antizyme 3                                | Cytoplasm           | transporter                       |
| NM_138983.2        | OLIG1                    | oligodendrocyte transcription factor 1                            | Nucleus             | transcription regulator           |
| NM_000912.3        | OPRK1                    | opioid receptor, kappa 1                                          | Plasma Membrane     | G-protein coupled receptor        |
| NM_00100445<br>1.1 | OR1J1                    | olfactory receptor family 1 subfamily J member 1                  | Plasma Membrane     | G-protein coupled receptor        |
| NM_030905.2        | OR2J2                    | olfactory receptor family 2 subfamily J member 2                  | Plasma              | G-protein                         |

|                    |         |                                                   |                     |                            |
|--------------------|---------|---------------------------------------------------|---------------------|----------------------------|
|                    |         |                                                   | Membrane            | coupled receptor           |
| NM_00100547<br>0.1 | OR4B1   | olfactory receptor family 4 subfamily B member 1  | Plasma Membrane     | G-protein coupled receptor |
| NM_00100527<br>0.2 | OR4C12  | olfactory receptor family 4 subfamily C member 12 | Plasma Membrane     | G-protein coupled receptor |
| NM_00100475<br>3.1 | OR51F2  | olfactory receptor family 51 subfamily F member 2 | Plasma Membrane     | G-protein coupled receptor |
| NM_00100523<br>8.1 | OR51G2  | olfactory receptor family 51 subfamily G member 2 | Plasma Membrane     | G-protein coupled receptor |
| NM_00100474<br>2.1 | OR5M3   | olfactory receptor family 5 subfamily M member 3  | Plasma Membrane     | G-protein coupled receptor |
| NM_00100474<br>6.1 | OR5T2   | olfactory receptor family 5 subfamily T member 2  | Plasma Membrane     | G-protein coupled receptor |
| NM_173351.1        | OR6B3   | olfactory receptor family 6 subfamily B member 3  | Plasma Membrane     | G-protein coupled receptor |
| NM_198944.1        | OR7C1   | olfactory receptor family 7 subfamily C member 1  | Plasma Membrane     | G-protein coupled receptor |
| NM_000608.2        | ORM2    | orosomucoid 2                                     | Extracellular Space | other                      |
| NM_030979.2        | PABPC3  | poly(A) binding protein, cytoplasmic 3            | Cytoplasm           | other                      |
| NM_080832.2        | PABPC5  | poly(A) binding protein, cytoplasmic 5            | Cytoplasm           | other                      |
| NM_002576.4        | PAK1    | p21 protein (Cdc42/Rac)-activated kinase 1        | Cytoplasm           | kinase                     |
| NM_152911.2        | PAOX    | polyamine oxidase (exo-N4-amino)                  | Cytoplasm           | enzyme                     |
| NM_178422.4        | PAQR7   | progesterin and adipoQ receptor family member VII | Plasma Membrane     | other                      |
| NM_006437.3        | PARP4   | poly(ADP-ribose) polymerase family member 4       | Cytoplasm           | enzyme                     |
| NM_00114610<br>6.1 | PARP9   | poly(ADP-ribose) polymerase family member 9       | Nucleus             | enzyme                     |
| NM_00100382<br>8.1 | PARVB   | parvin beta                                       | Cytoplasm           | other                      |
| NM_006192.3        | PAX1    | paired box 1                                      | Nucleus             | transcription regulator    |
| NM_00114277<br>0.1 | PCDH15  | protocadherin-related 15                          | Plasma Membrane     | other                      |
| NM_031882.2        | PCDHAC1 | protocadherin alpha subfamily C, 1                | Plasma Membrane     | other                      |
| NM_018936.2        | PCDHB2  | protocadherin beta 2                              | Plasma Membrane     | other                      |
| NM_032373.3        | PCGF5   | polycomb group ring finger 5                      | Cytoplasm           | other                      |
| NM_013232.3        | PDCD6   | programmed cell death 6                           | Cytoplasm           | other                      |
| NM_018945.3        | PDE7B   | phosphodiesterase 7B                              | Cytoplasm           | enzyme                     |
| NM_173806.3        | PDZD9   | PDZ domain containing 9                           | Other               | other                      |
| NM_000442.3        | PECAM1  | platelet/endothelial cell adhesion molecule 1     | Plasma Membrane     | other                      |
| NM_002627.3        | PFKP    | phosphofructokinase, platelet                     | Cytoplasm           | kinase                     |
| NM_000290.3        | PGAM2   | phosphoglycerate mutase 2                         | Cytoplasm           | phosphatase                |
| NM_138733.4        | PGK2    | phosphoglycerate kinase 2                         | Cytoplasm           | kinase                     |
| NM_173341.1        | PHF7    | PHD finger protein 7                              | Nucleus             | other                      |
| NM_018425.2        | PI4K2A  | phosphatidylinositol 4-kinase type 2 alpha        | Cytoplasm           | kinase                     |
| NM_007166.2        | PICALM  | phosphatidylinositol binding clathrin assembly    | Cytoplasm           | other                      |

|                    |                         | protein                                                                                                   |                 |                         |
|--------------------|-------------------------|-----------------------------------------------------------------------------------------------------------|-----------------|-------------------------|
| NM_178272.1        | PILRA                   | paired immunoglobulin-like type 2 receptor alpha                                                          | Plasma Membrane | other                   |
| NR_002319.2        | PIPSL                   | PIP5K1A and PSMD4-like, pseudogene                                                                        | Other           | other                   |
| NM_004571.3        | PKNOX1                  | PBX/knotted 1 homeobox 1                                                                                  | Nucleus         | transcription regulator |
| NM_002657.3        | PLAGL2                  | PLAG1 like zinc finger 2                                                                                  | Nucleus         | transcription regulator |
| NM_020359.1        | PLSCR2                  | phospholipid scramblase 2                                                                                 | Other           | other                   |
| NM_000534.4        | PMS1                    | PMS1 homolog 1, mismatch repair system component                                                          | Nucleus         | enzyme                  |
| NM_00110314<br>9.1 | PNMAL1                  | paraneoplastic Ma antigen family-like 1                                                                   | Other           | other                   |
| NM_021173.3        | POLD4                   | polymerase (DNA-directed), delta 4, accessory subunit                                                     | Nucleus         | enzyme                  |
| NM_007215.3        | POLG2                   | polymerase (DNA directed), gamma 2, accessory subunit                                                     | Cytoplasm       | enzyme                  |
| NM_006233.4        | POLR2I                  | polymerase (RNA) II (DNA directed) polypeptide I, 14.5kDa                                                 | Nucleus         | transcription regulator |
| NM_00113611<br>4.1 | POMT1                   | protein-O-mannosyltransferase 1                                                                           | Cytoplasm       | enzyme                  |
| NM_015029.2        | POP1                    | POP1 homolog, ribonuclease P/MRP subunit                                                                  | Nucleus         | enzyme                  |
| NM_00114544<br>2.1 | POTEH (includes others) | POTE ankyrin domain family member M                                                                       | Other           | other                   |
| NM_002703.3        | PPAT                    | phosphoribosyl pyrophosphate amidotransferase                                                             | Cytoplasm       | enzyme                  |
| NM_003625.2        | PPFIA2                  | protein tyrosine phosphatase, receptor type, f polypeptide (PTPRF), interacting protein (liprin), alpha 2 | Plasma Membrane | phosphatase             |
| NM_021130.3        | PPIA                    | peptidylprolyl isomerase A                                                                                | Cytoplasm       | enzyme                  |
| NM_173672.4        | PPIL6                   | peptidylprolyl isomerase like 6                                                                           | Other           | enzyme                  |
| NM_177983.1        | PPM1G                   | protein phosphatase, Mg2+/Mn2+ dependent 1G                                                               | Nucleus         | phosphatase             |
| NM_005167.5        | PPM1J                   | protein phosphatase, Mg2+/Mn2+ dependent 1J                                                               | Other           | phosphatase             |
| NM_016147.1        | PPME1                   | protein phosphatase methylesterase 1                                                                      | Other           | enzyme                  |
| NM_002710.2        | PPP1CC                  | protein phosphatase 1, catalytic subunit, gamma isozyme                                                   | Nucleus         | phosphatase             |
| NM_006241.4        | PPP1R2                  | protein phosphatase 1 regulatory inhibitor subunit 2                                                      | Cytoplasm       | phosphatase             |
| NM_00101362<br>6.2 | PPP1R42                 | protein phosphatase 1 regulatory subunit 42                                                               | Cytoplasm       | other                   |
| NM_017917.2        | PPP2R3C                 | protein phosphatase 2 regulatory subunit B", gamma                                                        | Cytoplasm       | other                   |
| NM_014678.3        | PPP6R2                  | protein phosphatase 6 regulatory subunit 2                                                                | Cytoplasm       | other                   |
| NM_00101227<br>7.1 | PRAMEF7/PRAM EF8        | PRAME family member 8                                                                                     | Other           | other                   |
| NM_00113623<br>9.1 | PRDM6                   | PR domain containing 6                                                                                    | Nucleus         | other                   |
| NM_020227.2        | PRDM9                   | PR domain containing 9                                                                                    | Nucleus         | enzyme                  |
| NM_198859.3        | PRICKLE2                | prickle planar cell polarity protein 2                                                                    | Nucleus         | other                   |
| NM_000947.2        | PRIM2                   | primase, DNA, polypeptide 2 (58kDa)                                                                       | Nucleus         | enzyme                  |
| NM_004157.2        | PRKAR2A                 | protein kinase, cAMP-dependent, regulatory subunit type II alpha                                          | Cytoplasm       | kinase                  |
| NM_145040.2        | PRKCDBP                 | protein kinase C, delta binding protein                                                                   | Cytoplasm       | other                   |
| NM_002761.2        | PRM1                    | protamine 1                                                                                               | Nucleus         | other                   |
| NM_002761.2        | PRM1                    | protamine 1                                                                                               | Nucleus         | other                   |
| NM_002762.2        | PRM2                    | protamine 2                                                                                               | Nucleus         | other                   |
| NM_012409.2        | PRND                    | prion protein 2 (dublet)                                                                                  | Plasma Membrane | other                   |
| NM_172341.1        | PSENEN                  | presenilin enhancer gamma secretase subunit                                                               | Plasma          | peptidase               |

|               |           |                                                                   |                     |                         |
|---------------|-----------|-------------------------------------------------------------------|---------------------|-------------------------|
|               |           |                                                                   | Membrane            |                         |
| NM_006742.2   | PSKH1     | protein serine kinase H1                                          | Nucleus             | kinase                  |
| NM_002789.4   | PSMA4     | proteasome subunit alpha 4                                        | Cytoplasm           | peptidase               |
| NM_002799.2   | PSMB7     | proteasome subunit beta 7                                         | Cytoplasm           | peptidase               |
| NM_002808.3   | PSMD2     | proteasome 26S subunit, non-ATPase 2                              | Cytoplasm           | other                   |
| NM_020232.3   | PSMG2     | proteasome (prosome, macropain) assembly chaperone 2              | Nucleus             | other                   |
| NR_023917.1   | PTENP1    | phosphatase and tensin homolog pseudogene 1 (functional)          | Cytoplasm           | other                   |
| NM_015317.1   | PUM2      | pumilio RNA binding family member 2                               | Cytoplasm           | other                   |
| NM_002854.2   | PVALB     | parvalbumin                                                       | Cytoplasm           | other                   |
| NM_006505.3   | PVR       | poliovirus receptor                                               | Plasma Membrane     | other                   |
| NM_015480.1   | PVRL3     | poliovirus receptor-related 3                                     | Plasma Membrane     | other                   |
| NM_015470.2   | RAB11FIP5 | RAB11 family interacting protein 5 (class I)                      | Cytoplasm           | other                   |
| NM_00101797.2 | RAB28     | RAB28, member RAS oncogene family                                 | Plasma Membrane     | enzyme                  |
| NM_002865.1   | RAB2A     | RAB2A, member RAS oncogene family                                 | Cytoplasm           | enzyme                  |
| NM_022456.3   | RAB3IP    | RAB3A interacting protein                                         | Cytoplasm           | other                   |
| NM_016577.3   | RAB6B     | RAB6B, member RAS oncogene family                                 | Cytoplasm           | enzyme                  |
| NM_013277.3   | RACGAP1   | Rac GTPase activating protein 1                                   | Cytoplasm           | transporter             |
| NM_002877.4   | RAD51B    | RAD51 paralog B                                                   | Nucleus             | enzyme                  |
| NM_006325.3   | RAN       | RAN, member RAS oncogene family                                   | Nucleus             | enzyme                  |
| NM_016492.4   | RANGRF    | RAN guanine nucleotide release factor                             | Nucleus             | transporter             |
| NM_213589.1   | RAPH1     | Ras association (RalGDS/AF-6) and pleckstrin homology domains 1   | Plasma Membrane     | other                   |
| NM_004841.3   | RASAL2    | RAS protein activator like 2                                      | Extracellular Space | other                   |
| NM_153815.2   | RASGRF1   | Ras protein specific guanine nucleotide releasing factor 1        | Cytoplasm           | other                   |
| NM_005447.3   | RASSF9    | Ras association (RalGDS/AF-6) domain family (N-terminal) member 9 | Cytoplasm           | transporter             |
| NR_015343.1   | RBAKDN    | RBAK downstream neighbor (non-protein coding)                     | Other               | other                   |
| NM_203390.2   | RBM12B    | RNA binding motif protein 12B                                     | Other               | other                   |
| NM_016196.3   | RBM19     | RNA binding motif protein 19                                      | Nucleus             | other                   |
| NM_018047.2   | RBM22     | RNA binding motif protein 22                                      | Nucleus             | transporter             |
| NM_025232.2   | REEP4     | receptor accessory protein 4                                      | Cytoplasm           | other                   |
| NM_138393.1   | REEP6     | receptor accessory protein 6                                      | Plasma Membrane     | other                   |
| NM_002913.3   | RFC1      | replication factor C subunit 1                                    | Nucleus             | transcription regulator |
| NM_003721.2   | RFXANK    | regulatory factor X associated ankyrin containing protein         | Nucleus             | transcription regulator |
| NM_183353.2   | RLIM      | ring finger protein, LIM domain interacting                       | Nucleus             | enzyme                  |
| NM_006911.2   | RLN1      | relaxin 1                                                         | Extracellular Space | other                   |
| NM_145250.3   | RNASE11   | ribonuclease, RNase A family, 11 (non-active)                     | Extracellular Space | other                   |
| NM_016422.3   | RNF141    | ring finger protein 141                                           | Other               | enzyme                  |
| NM_016494.3   | RNF181    | ring finger protein 181                                           | Other               | enzyme                  |
| NM_00114668.2 | RNF222    | ring finger protein 222                                           | Other               | other                   |
| NM_017578.2   | ROPN1     | rhopilin associated tail protein 1                                | Cytoplasm           | other                   |
| NM_080746.2   | RPL10L    | ribosomal protein L10 like                                        | Nucleus             | other                   |
| NM_000995.3   | RPL34     | ribosomal protein L34                                             | Cytoplasm           | other                   |

|                    |          |                                                                                                 |                         |                            |
|--------------------|----------|-------------------------------------------------------------------------------------------------|-------------------------|----------------------------|
| NM_183005.3        | RPP38    | ribonuclease P/MRP 38kDa subunit                                                                | Nucleus                 | enzyme                     |
| NM_152732.3        | RSPH9    | radial spoke head 9 homolog (Chlamydomonas)                                                     | Other                   | other                      |
| NM_00117250<br>9.1 | SATB2    | SATB homeobox 2                                                                                 | Nucleus                 | transcription<br>regulator |
| NM_00116016<br>0.1 | SCN5A    | sodium channel, voltage gated, type V alpha<br>subunit                                          | Plasma<br>Membrane      | ion channel                |
| NM_00113041<br>3.1 | SCNN1D   | sodium channel, non voltage gated 1 delta<br>subunit                                            | Plasma<br>Membrane      | ion channel                |
| NM_003000.2        | SDHB     | succinate dehydrogenase complex subunit B, iron<br>sulfur (Ip)                                  | Cytoplasm               | enzyme                     |
| NM_006378.3        | SEMA4D   | semaphorin 4D                                                                                   | Plasma<br>Membrane      | transmembrane<br>receptor  |
| NM_003008.2        | SEMG2    | semenogelin II                                                                                  | Extracellul<br>ar Space | other                      |
| NM_021627.2        | SENP2    | SUMO1/sentrin/SMT3 specific peptidase 2                                                         | Nucleus                 | peptidase                  |
| NM_020654.3        | SENP7    | SUMO1/sentrin specific peptidase 7                                                              | Nucleus                 | peptidase                  |
| NM_144605.3        | SEPT12   | septin 12                                                                                       | Cytoplasm               | other                      |
| NR_024271.1        | SEPT7P2  | septin 7 pseudogene 2                                                                           | Other                   | other                      |
| NM_032861.3        | SERAC1   | serine active site containing 1                                                                 | Extracellul<br>ar Space | other                      |
| NM_004568.4        | SERPINB6 | serpin peptidase inhibitor, clade B (ovalbumin),<br>member 6                                    | Cytoplasm               | other                      |
| NM_144665.2        | SESN3    | sestrin 3                                                                                       | Extracellul<br>ar Space | other                      |
| NM_199344.2        | SFT2D2   | SFT2 domain containing 2                                                                        | Cytoplasm               | other                      |
| NM_032740.3        | SFT2D3   | SFT2 domain containing 3                                                                        | Other                   | other                      |
| NM_198843.2        | SFTPB    | surfactant protein B                                                                            | Extracellul<br>ar Space | other                      |
| NM_00109928<br>9.1 | SH3RF3   | SH3 domain containing ring finger 3                                                             | Other                   | other                      |
| NM_023068.3        | SIGLEC1  | sialic acid binding Ig-like lectin 1, sialoadhesin                                              | Plasma<br>Membrane      | other                      |
| NM_033130.4        | SIGLEC10 | sialic acid binding Ig-like lectin 10                                                           | Plasma<br>Membrane      | other                      |
| NM_015073.1        | SIPA1L3  | signal-induced proliferation-associated 1 like 3                                                | Extracellul<br>ar Space | other                      |
| NM_004694.4        | SLC16A6  | solute carrier family 16 member 6                                                               | Plasma<br>Membrane      | transporter                |
| NM_004731.3        | SLC16A7  | solute carrier family 16 (monocarboxylate<br>transporter), member 7                             | Plasma<br>Membrane      | transporter                |
| NM_005071.1        | SLC1A6   | solute carrier family 1 (high affinity<br>aspartate/glutamate transporter), member 6            | Plasma<br>Membrane      | transporter                |
| NM_002555.5        | SLC22A18 | solute carrier family 22 member 18                                                              | Plasma<br>Membrane      | transporter                |
| NM_012140.3        | SLC25A10 | solute carrier family 25 (mitochondrial carrier;<br>dicarboxylate transporter), member 10       | Cytoplasm               | transporter                |
| NM_021734.4        | SLC25A19 | solute carrier family 25 (mitochondrial thiamine<br>pyrophosphate carrier), member 19           | Cytoplasm               | transporter                |
| NM_031291.2        | SLC25A31 | solute carrier family 25 (mitochondrial carrier;<br>adenine nucleotide translocator), member 31 | Cytoplasm               | transporter                |
| NM_138773.1        | SLC25A46 | solute carrier family 25 member 46                                                              | Cytoplasm               | other                      |
| NM_145282.4        | SLC25A48 | solute carrier family 25 member 48                                                              | Other                   | other                      |
| NM_005094.3        | SLC27A4  | solute carrier family 27 (fatty acid transporter),<br>member 4                                  | Plasma<br>Membrane      | transporter                |
| NM_005094.3        | SLC27A4  | solute carrier family 27 (fatty acid transporter),<br>member 4                                  | Plasma<br>Membrane      | transporter                |
| NM_003039.2        | SLC2A5   | solute carrier family 2 (facilitated<br>glucose/fructose transporter), member 5                 | Plasma<br>Membrane      | transporter                |
| NM_014580.3        | SLC2A8   | solute carrier family 2 (facilitated glucose                                                    | Plasma                  | transporter                |



|                    |          |                                                                             |                     |                         |
|--------------------|----------|-----------------------------------------------------------------------------|---------------------|-------------------------|
|                    |          | transporter), member 8                                                      | Membrane            |                         |
| NM_00117799<br>8.1 | SLC34A2  | solute carrier family 34 (type II sodium/phosphate cotransporter), member 2 | Plasma Membrane     | transporter             |
| NM_138570.2        | SLC38A10 | solute carrier family 38 member 10                                          | Cytoplasm           | other                   |
| NM_144564.4        | SLC39A3  | solute carrier family 39 (zinc transporter), member 3                       | Plasma Membrane     | transporter             |
| NM_003615.3        | SLC4A7   | solute carrier family 4, sodium bicarbonate cotransporter, member 7         | Plasma Membrane     | transporter             |
| NM_144990.3        | SLFNL1   | schlafen like 1                                                             | Other               | other                   |
| NM_00112721<br>7.2 | SMAD9    | SMAD family member 9                                                        | Nucleus             | transcription regulator |
| NM_017575.4        | SMG6     | SMG6 nonsense mediated mRNA decay factor                                    | Nucleus             | enzyme                  |
| NM_022739.3        | SMURF2   | SMAD specific E3 ubiquitin protein ligase 2                                 | Cytoplasm           | enzyme                  |
| NM_004782.3        | SNAP29   | synaptosome associated protein 29kDa                                        | Cytoplasm           | transporter             |
| NR_029472.1        | SNRPC    | small nuclear ribonucleoprotein polypeptide C                               | Nucleus             | other                   |
| NM_182854.2        | SNX20    | sorting nexin 20                                                            | Cytoplasm           | other                   |
| NM_080627.2        | SOGA1    | suppressor of glucose, autophagy associated 1                               | Extracellular Space | other                   |
| NM_017425.3        | SPA17    | sperm autoantigenic protein 17                                              | Plasma Membrane     | other                   |
| NM_006461.3        | SPAG5    | sperm associated antigen 5                                                  | Nucleus             | peptidase               |
| NM_00113052<br>8.2 | SPAG9    | sperm associated antigen 9                                                  | Cytoplasm           | other                   |
| NM_138796.2        | SPATA17  | spermatogenesis associated 17                                               | Other               | other                   |
| NM_00117069<br>6.1 | SPATA22  | spermatogenesis associated 22                                               | Other               | other                   |
| NM_00117069<br>6.1 | SPATA22  | spermatogenesis associated 22                                               | Other               | other                   |
| NM_194296.1        | SPATA24  | spermatogenesis associated 24                                               | Nucleus             | other                   |
| NM_173499.3        | SPATA8   | spermatogenesis associated 8                                                | Other               | other                   |
| NM_00110042<br>2.1 | SPATS2L  | spermatogenesis associated, serine rich 2 like                              | Nucleus             | other                   |
| NM_014752.2        | SPCS2    | signal peptidase complex subunit 2                                          | Cytoplasm           | other                   |
| NM_024867.3        | SPEF2    | sperm flagellar 2                                                           | Cytoplasm           | other                   |
| NM_145658.3        | SPESP1   | sperm equatorial segment protein 1                                          | Cytoplasm           | other                   |
| NM_006542.3        | SPHAR    | S-phase response (cyclin related)                                           | Other               | other                   |
| NM_021114.2        | SPINK2   | serine peptidase inhibitor, Kazal type 2 (acrosin-trypsin inhibitor)        | Extracellular Space | other                   |
| NM_021102.3        | SPINT2   | serine peptidase inhibitor, Kunitz type, 2                                  | Extracellular Space | other                   |
| NM_020148.2        | SPIRE1   | spire-type actin nucleation factor 1                                        | Cytoplasm           | other                   |
| NM_00104252<br>2.1 | SPRED3   | sprouty-related, EVH1 domain containing 3                                   | Extracellular Space | cytokine                |
| NM_198291.1        | SRC      | SRC proto-oncogene, non-receptor tyrosine kinase                            | Cytoplasm           | kinase                  |
| NM_015908.5        | SRRT     | serrate, RNA effector molecule                                              | Nucleus             | other                   |
| NM_006275.5        | SRSF6    | serine/arginine-rich splicing factor 6                                      | Nucleus             | other                   |
| NM_015931.1        | SSUH2    | ssu-2 homolog (C. elegans)                                                  | Cytoplasm           | other                   |
| NM_012447.2        | STAG3    | stromal antigen 3                                                           | Nucleus             | other                   |
| NM_139171.1        | STARD6   | StAR related lipid transfer domain containing 6                             | Other               | transporter             |
| NM_004226.3        | STK17B   | serine/threonine kinase 17b                                                 | Nucleus             | kinase                  |
| NM_032017.1        | STK40    | serine/threonine kinase 40                                                  | Cytoplasm           | kinase                  |
| NM_00116596<br>9.1 | STRADA   | STE20-related kinase adaptor alpha                                          | Nucleus             | kinase                  |
| NM_178862.1        | STT3B    | STT3B, subunit of the oligosaccharyltransferase complex (catalytic)         | Cytoplasm           | enzyme                  |
| NM_016086.2        | STYXL1   | serine/threonine/tyrosine interacting-like 1                                | Cytoplasm           | phosphatase             |

|                    |             |                                                          |                     |                            |
|--------------------|-------------|----------------------------------------------------------|---------------------|----------------------------|
| NM_003849.3        | SUCLG1      | succinate-CoA ligase, alpha subunit                      | Cytoplasm           | enzyme                     |
| NM_003169.3        | SUPT5H      | SPT5 homolog, DSIF elongation factor subunit             | Nucleus             | transcription regulator    |
| NM_00110551<br>8.1 | SWT1        | SWT1, RNA endoribonuclease homolog                       | Extracellular Space | other                      |
| NM_00112322<br>5.1 | SYCE3       | synaptonemal complex central element protein 3           | Nucleus             | other                      |
| NM_153694.4        | SYCP3       | synaptonemal complex protein 3                           | Nucleus             | other                      |
| NM_00103308<br>0.1 | TAAR2       | trace amine associated receptor 2                        | Plasma Membrane     | G-protein coupled receptor |
| NM_006284.2        | TAF10       | TATA-box binding protein associated factor 10            | Nucleus             | transcription regulator    |
| NM_005640.1        | TAF4B       | TATA-box binding protein associated factor 4b            | Nucleus             | transcription regulator    |
| NM_016151.2        | TAOK2       | TAO kinase 2                                             | Cytoplasm           | kinase                     |
| NM_144628.2        | TBC1D20     | TBC1 domain family member 20                             | Nucleus             | other                      |
| NM_153356.1        | TBC1D21     | TBC1 domain family member 21                             | Cytoplasm           | other                      |
| NM_00102983<br>9.2 | TCAIM       | T-cell activation inhibitor, mitochondrial               | Cytoplasm           | other                      |
| NR_002947.1        | TCAM1P      | testicular cell adhesion molecule 1, pseudogene          | Other               | other                      |
| NM_003202.3        | TCF7        | transcription factor 7 (T-cell specific, HMG-box)        | Nucleus             | transcription regulator    |
| NM_006602.2        | TCFL5       | transcription factor-like 5 (basic helix-loop-helix)     | Nucleus             | transcription regulator    |
| NM_018679.4        | TCP11       | t-complex 11, testis-specific                            | Other               | other                      |
| NM_018679.4        | TCP11       | t-complex 11, testis-specific                            | Other               | other                      |
| NM_138779.3        | TEX30       | testis expressed 30                                      | Other               | other                      |
| NM_00103949<br>6.1 | TEX40       | testis expressed 40                                      | Cytoplasm           | other                      |
| NM_00117813<br>8.1 | TFDP2       | transcription factor Dp-2 (E2F dimerization partner 2)   | Nucleus             | transcription regulator    |
| NM_024672.4        | THAP9       | THAP domain containing 9                                 | Other               | enzyme                     |
| NM_017872.3        | THG1L       | tRNA-histidine guanylyltransferase 1-like                | Cytoplasm           | enzyme                     |
| NM_145715.2        | TIGD2       | tigger transposable element derived 2                    | Other               | other                      |
| NM_007005.3        | TLE4        | transducin like enhancer of split 4                      | Nucleus             | transcription regulator    |
| NM_016056.2        | TMBIM4      | transmembrane BAX inhibitor motif containing 4           | Nucleus             | other                      |
| NM_080751.2        | TMC2        | transmembrane channel like 2                             | Plasma Membrane     | ion channel                |
| NM_144686.2        | TMC4        | transmembrane channel like 4                             | Cytoplasm           | other                      |
| NR_030761.1        | TMED5       | transmembrane p24 trafficking protein 5                  | Cytoplasm           | other                      |
| NM_178031.2        | TMEM132A    | transmembrane protein 132A                               | Cytoplasm           | other                      |
| NM_194280.3        | TMEM219     | transmembrane protein 219                                | Other               | other                      |
| NM_152388.2        | TMEM237     | transmembrane protein 237                                | Other               | other                      |
| NR_027428.1        | TMEM254-AS1 | TMEM254 antisense RNA 1                                  | Other               | other                      |
| NM_182541.2        | TMEM31      | transmembrane protein 31                                 | Other               | other                      |
| NM_018022.2        | TMEM51      | transmembrane protein 51                                 | Other               | other                      |
| NM_182559.2        | TMPRSS12    | transmembrane (C-terminal) protease, serine 12           | Other               | peptidase                  |
| NM_00108049<br>5.2 | TNRC18      | trinucleotide repeat containing 18                       | Nucleus             | other                      |
| NM_00116250<br>1.1 | TNRC6B      | trinucleotide repeat containing 6B                       | Other               | other                      |
| NM_015476.2        | TPGS2       | tubulin polyglutamylase complex subunit 2                | Nucleus             | other                      |
| NM_173846.4        | TPPP2       | tubulin polymerization-promoting protein family member 2 | Nucleus             | other                      |
| NM_003292.2        | TPR         | translocated promoter region, nuclear basket             | Nucleus             | transporter                |

|                    |          |                                                                    |                     |                         |
|--------------------|----------|--------------------------------------------------------------------|---------------------|-------------------------|
|                    |          | protein                                                            |                     |                         |
| NM_199259.2        | TPTE     | transmembrane phosphatase with tensin homology                     | Plasma Membrane     | phosphatase             |
| NM_014939.3        | TRAPPC8  | trafficking protein particle complex 8                             | Cytoplasm           | transporter             |
| NM_178174.2        | TREML1   | triggering receptor expressed on myeloid cells like 1              | Plasma Membrane     | other                   |
| NM_018700.3        | TRIM36   | tripartite motif containing 36                                     | Cytoplasm           | other                   |
| NM_033092.2        | TRIM5    | tripartite motif containing 5                                      | Cytoplasm           | enzyme                  |
| NM_00117179<br>6.1 | TRIQK    | triple QxxK/R motif containing                                     | Other               | other                   |
| NM_018646.2        | TRPV6    | transient receptor potential cation channel, subfamily V, member 6 | Plasma Membrane     | ion channel             |
| NM_144627.2        | TSACC    | TSSK6 activating co-chaperone                                      | Cytoplasm           | other                   |
| NM_006292.2        | TSG101   | tumor susceptibility 101                                           | Cytoplasm           | transcription regulator |
| NM_018430.2        | TSNAXIP1 | translin-associated factor X interacting protein 1                 | Cytoplasm           | other                   |
| NM_003270.2        | TSPAN6   | tetraspanin 6                                                      | Plasma Membrane     | other                   |
| NM_003309.3        | TSPYL1   | TSPY-like 1                                                        | Nucleus             | other                   |
| NM_052841.3        | TSSK3    | testis-specific serine kinase 3                                    | Other               | kinase                  |
| NM_174944.3        | TSSK4    | testis-specific serine kinase 4                                    | Cytoplasm           | kinase                  |
| NM_00110551<br>3.2 | TTC21A   | tetratricopeptide repeat domain 21A                                | Extracellular Space | other                   |
| NM_153712.4        | TTL      | tubulin tyrosine ligase                                            | Cytoplasm           | enzyme                  |
| NM_173623.3        | TTLL6    | tubulin tyrosine ligase like 6                                     | Other               | enzyme                  |
| NM_006088.5        | TUBB4B   | tubulin beta 4B class IVb                                          | Cytoplasm           | other                   |
| NM_052903.4        | TUBGCP5  | tubulin gamma complex associated protein 5                         | Cytoplasm           | other                   |
| NM_003321.4        | TUFM     | Tu translation elongation factor, mitochondrial                    | Cytoplasm           | translation regulator   |
| NR_002323.1        | TUG1     | taurine up-regulated 1 (non-protein coding)                        | Other               | other                   |
| NM_018955.2        | UBB      | ubiquitin B                                                        | Cytoplasm           | enzyme                  |
| NM_005339.4        | UBE2K    | ubiquitin conjugating enzyme E2K                                   | Cytoplasm           | transcription regulator |
| NM_022066.3        | UBE2O    | ubiquitin conjugating enzyme E2O                                   | Nucleus             | enzyme                  |
| NM_198920.1        | UBE3D    | ubiquitin protein ligase E3D                                       | Other               | other                   |
| NM_021833.4        | UCP1     | uncoupling protein 1 (mitochondrial, proton carrier)               | Cytoplasm           | transporter             |
| NR_028085.1        | UFSP2    | UFM1-specific peptidase 2                                          | Other               | enzyme                  |
| NM_00110567<br>7.1 | UGT2A2   | UDP glucuronosyltransferase 2 family, polypeptide A2               | Other               | other                   |
| NM_00108046<br>1.1 | UNCX     | UNC homeobox                                                       | Other               | transcription regulator |
| NM_007124.2        | UTRN     | utrophin                                                           | Plasma Membrane     | transmembrane receptor  |
| NM_00101798<br>0.3 | VMA21    | VMA21 vacuolar H <sup>+</sup> -ATPase homolog (S. cerevisiae)      | Cytoplasm           | other                   |
| NM_181661.2        | VPS13B   | vacuolar protein sorting 13 homolog B (yeast)                      | Nucleus             | transporter             |
| NM_015289.2        | VPS39    | VPS39 HOPS complex subunit                                         | Cytoplasm           | transporter             |
| NM_024626.2        | VTCN1    | V-set domain containing T cell activation inhibitor 1              | Plasma Membrane     | other                   |
| NM_00102493<br>5.1 | WASF1    | WAS protein family member 1                                        | Nucleus             | other                   |
| NM_00100665<br>7.1 | WDR35    | WD repeat domain 35                                                | Cytoplasm           | other                   |
| NM_032118.2        | WDR54    | WD repeat domain 54                                                | Other               | other                   |
| NM_133264.4        | WIPF2    | WAS/WASL interacting protein family member 2                       | Cytoplasm           | other                   |

|                |         |                                                     |                 |                            |
|----------------|---------|-----------------------------------------------------|-----------------|----------------------------|
| NM_052898.1    | XKR4    | X-linked Kx blood group related 4                   | Other           | other                      |
| NM_004736.3    | XPR1    | xenotropic and polytropic retrovirus receptor 1     | Plasma Membrane | G-protein coupled receptor |
| NM_001006114.1 | YBEY    | ybeY metallopeptidase (putative)                    | Cytoplasm       | other                      |
| NM_004559.3    | YBX1    | Y-box binding protein 1                             | Nucleus         | transcription regulator    |
| NM_024029.3    | YIPF2   | Yip1 domain family member 2                         | Cytoplasm       | other                      |
| NM_182592.2    | YIPF7   | Yip1 domain family member 7                         | Other           | other                      |
| NM_198537.2    | YJEFN3  | YjeF N-terminal domain containing 3                 | Other           | other                      |
| NM_017798.3    | YTHDF1  | YTH N(6)-methyladenosine RNA binding protein 1      | Other           | other                      |
| NM_001105539.1 | ZBTB10  | zinc finger and BTB domain containing 10            | Nucleus         | other                      |
| NM_001164342.1 | ZBTB20  | zinc finger and BTB domain containing 20            | Nucleus         | transcription regulator    |
| NM_032792.2    | ZBTB45  | zinc finger and BTB domain containing 45            | Nucleus         | other                      |
| NM_207662.3    | ZC3H14  | zinc finger CCCH-type containing 14                 | Nucleus         | other                      |
| NM_001128324.1 | ZFAND4  | zinc finger, AN1-type domain 4                      | Other           | other                      |
| NM_053023.3    | ZFP91   | ZFP91 zinc finger protein                           | Nucleus         | transcription regulator    |
| XM_001724926.2 | ZMYM6NB | ZMYM6 neighbor                                      | Other           | other                      |
| NM_021047.2    | ZNF253  | zinc finger protein 253                             | Nucleus         | transcription regulator    |
| NM_012482.3    | ZNF281  | zinc finger protein 281                             | Nucleus         | transcription regulator    |
| NM_170686.2    | ZNF398  | zinc finger protein 398                             | Nucleus         | transcription regulator    |
| NM_001001415.2 | ZNF429  | zinc finger protein 429                             | Nucleus         | other                      |
| NM_025189.3    | ZNF430  | zinc finger protein 430                             | Nucleus         | other                      |
| NM_001101419.1 | ZNF541  | zinc finger protein 541                             | Nucleus         | other                      |
| NM_145271.3    | ZNF688  | zinc finger protein 688                             | Other           | other                      |
| NM_206894.2    | ZNF790  | zinc finger protein 790                             | Other           | other                      |
| NM_004773.2    | ZNHIT3  | zinc finger, HIT-type containing 3                  | Nucleus         | transcription regulator    |
| NM_147128.3    | ZNRF2   | zinc and ring finger 2, E3 ubiquitin protein ligase | Other           | enzyme                     |
| NM_003904.3    | ZPR1    | ZPR1 zinc finger                                    | Nucleus         | other                      |
| NM_152677.2    | ZSCAN4  | zinc finger and SCAN domain containing 4            | Nucleus         | other                      |
| NM_006299.3    | ZSCAN9  | zinc finger and SCAN domain containing 9            | Nucleus         | transcription regulator    |
| XM_001133704.1 |         | unknown                                             | unknown         | unknown                    |
| XM_001714193.1 |         | unknown                                             | unknown         | unknown                    |
| XM_001714387.2 |         | unknown                                             | unknown         | unknown                    |
| XM_001716063.1 |         | unknown                                             | unknown         | unknown                    |
| XM_001719118.1 |         | unknown                                             | unknown         | unknown                    |
| XM_001725120.2 |         | unknown                                             | unknown         | unknown                    |
| XM_001725120.2 |         | unknown                                             | unknown         | unknown                    |

|                    |  |         |         |         |
|--------------------|--|---------|---------|---------|
| XM_00234416<br>6.1 |  | unknown | unknown | unknown |
| XM_00234740<br>1.1 |  | unknown | unknown | unknown |
| XM_00234784<br>7.1 |  | unknown | unknown | unknown |
| XM_934920.4        |  | unknown | unknown | unknown |
| XR_038906.2        |  | unknown | unknown | unknown |
| XR_039130.2        |  | unknown | unknown | unknown |
| XR_040674.1        |  | unknown | unknown | unknown |
| XR_042117.1        |  | unknown | unknown | unknown |
| XR_078317.1        |  | unknown | unknown | unknown |
| XR_078370.1        |  | unknown | unknown | unknown |
| XR_078671.1        |  | unknown | unknown | unknown |
| XR_079298.1        |  | unknown | unknown | unknown |

Supplementary Table S2. Up-regulated Genes in Cluster B

| ID                 | Symbol  | Entrez Gene Name                                                                         | Location            | Type(s)                 |
|--------------------|---------|------------------------------------------------------------------------------------------|---------------------|-------------------------|
| NM_015429.3        | ABI3BP  | ABI family member 3 binding protein                                                      | Extracellular Space | other                   |
| NM_014384.2        | ACAD8   | acyl-CoA dehydrogenase family member 8                                                   | Cytoplasm           | enzyme                  |
| NM_014716.3        | ACAP1   | ArfGAP with coiled-coil, ankyrin repeat and PH domains 1                                 | Plasma Membrane     | other                   |
| NM_025149.4        | ACSF2   | acyl-CoA synthetase family member 2                                                      | Cytoplasm           | enzyme                  |
| NM_177989.2        | ACTL6A  | actin like 6A                                                                            | Nucleus             | other                   |
| NM_004302.3        | ACVR1B  | activin A receptor type IB                                                               | Plasma Membrane     | kinase                  |
| NM_001169122<br>.1 | AFF2    | AF4/FMR2 family member 2                                                                 | Nucleus             | other                   |
| NM_000476.2        | AK1     | adenylate kinase 1                                                                       | Cytoplasm           | kinase                  |
| NM_000690.2        | ALDH2   | aldehyde dehydrogenase 2 family (mitochondrial)                                          | Cytoplasm           | enzyme                  |
| NM_001127617<br>.1 | ALDOA   | aldolase, fructose-bisphosphate A                                                        | Cytoplasm           | enzyme                  |
| NR_024400.1        | ANAPC13 | anaphase promoting complex subunit 13                                                    | Nucleus             | other                   |
| NM_052855.3        | ANKRD40 | ankyrin repeat domain 40                                                                 | Other               | other                   |
| NM_001154.3        | ANXA5   | annexin A5                                                                               | Plasma Membrane     | transporter             |
| NM_001159.3        | AOX1    | aldehyde oxidase 1                                                                       | Cytoplasm           | enzyme                  |
| NM_144772.2        | APOA1BP | apolipoprotein A-I binding protein                                                       | Extracellular Space | enzyme                  |
| NM_175073.1        | APTX    | apoptaxin                                                                                | Nucleus             | phosphatase             |
| NM_006407.3        | ARL6IP5 | ADP ribosylation factor like GTPase 6 interacting protein 5                              | Cytoplasm           | other                   |
| NM_001030287<br>.2 | ATF3    | activating transcription factor 3                                                        | Nucleus             | transcription regulator |
| NM_005174.2        | ATP5C1  | ATP synthase, H <sup>+</sup> transporting, mitochondrial F1 complex, gamma polypeptide 1 | Cytoplasm           | transporter             |
| NM_004048.2        | B2M     | beta-2-microglobulin                                                                     | Plasma Membrane     | transmembrane receptor  |
| NM_001024372<br>.1 | BAALC   | brain and acute leukemia, cytoplasmic                                                    | Cytoplasm           | other                   |
| NM_000633.2        | BCL2    | B-cell CLL/lymphoma 2                                                                    | Cytoplasm           | transporter             |
| NM_007371.3        | BRD3    | bromodomain containing 3                                                                 | Nucleus             | kinase                  |

|                |          |                                                         |                     |                         |
|----------------|----------|---------------------------------------------------------|---------------------|-------------------------|
| NM_198591.1    | BSG      | basigin (Ok blood group)                                | Plasma Membrane     | transporter             |
| NM_181443.1    | BTBD3    | BTB (POZ) domain containing 3                           | Other               | other                   |
| NM_006763.2    | BTG2     | BTG family member 2                                     | Nucleus             | transcription regulator |
| NM_001145194.1 | C18orf42 | chromosome 18 open reading frame 42                     | Other               | other                   |
| NM_001105519.1 | C2orf70  | chromosome 2 open reading frame 70                      | Nucleus             | other                   |
| NM_032307.3    | C9orf64  | chromosome 9 open reading frame 64                      | Other               | other                   |
| NM_001740.4    | CALB2    | calbindin 2                                             | Cytoplasm           | other                   |
| NM_006136.2    | CAPZA2   | capping protein (actin filament) muscle Z-line, alpha 2 | Cytoplasm           | other                   |
| NM_014550.3    | CARD10   | caspase recruitment domain family member 10             | Cytoplasm           | other                   |
| NM_138423.2    | CASC4    | cancer susceptibility candidate 4                       | Cytoplasm           | other                   |
| NM_001172895.1 | CAV1     | caveolin 1                                              | Plasma Membrane     | transmembrane receptor  |
| NM_001031737.2 | CCDC78   | coiled-coil domain containing 78                        | Cytoplasm           | other                   |
| NM_001136017.2 | CCND3    | cyclin D3                                               | Nucleus             | other                   |
| NM_012073.3    | CCT5     | chaperonin containing TCP1 subunit 5                    | Cytoplasm           | other                   |
| NM_006725.3    | CD6      | CD6 molecule                                            | Plasma Membrane     | transmembrane receptor  |
| NM_001040034.1 | CD63     | CD63 molecule                                           | Plasma Membrane     | other                   |
| NM_002414.3    | CD99     | CD99 molecule                                           | Plasma Membrane     | other                   |
| NM_001791.3    | CDC42    | cell division cycle 42                                  | Cytoplasm           | enzyme                  |
| NM_001257.3    | CDH13    | cadherin 13                                             | Plasma Membrane     | other                   |
| NM_005195.3    | CEBPD    | CCAAT/enhancer binding protein delta                    | Nucleus             | transcription regulator |
| NM_004344.1    | CETN2    | centrin 2                                               | Nucleus             | enzyme                  |
| NM_001710.5    | CFB      | complement factor B                                     | Extracellular Space | peptidase               |
| NM_001928.2    | CFD      | complement factor D (adipsin)                           | Extracellular Space | peptidase               |
| NM_001928.2    | CFD      | complement factor D (adipsin)                           | Extracellular Space | peptidase               |
| NM_000204.3    | CFI      | complement factor I                                     | Extracellular Space | peptidase               |
| NM_001005753.1 | CHMP3    | charged multivesicular body protein 3                   | Cytoplasm           | other                   |
| NM_015455.3    | CNOT6    | CCR4-NOT transcription complex subunit 6                | Nucleus             | enzyme                  |
| NM_015719.3    | COL5A3   | collagen, type V, alpha 3                               | Extracellular Space | other                   |
| NM_004074.2    | COX8A    | cytochrome c oxidase subunit VIIIA (ubiquitous)         | Cytoplasm           | enzyme                  |
| NM_003476.3    | CSRP3    | cysteine and glycine rich protein 3                     | Nucleus             | other                   |
| NM_000100.2    | CSTB     | cystatin B                                              | Cytoplasm           | peptidase               |
| NM_021198.1    | CTDSP1   | CTD small phosphatase 1                                 | Nucleus             | phosphatase             |
| NM_148923.2    | CYB5A    | cytochrome b5 type A (microsomal)                       | Cytoplasm           | enzyme                  |
| NM_134268.3    | CYGB     | cytoglobin                                              | Cytoplasm           | transporter             |
| NM_000781.2    | CYP11A1  | cytochrome P450 family 11 subfamily A member 1          | Cytoplasm           | enzyme                  |
| NM_000102.3    | CYP17A1  | cytochrome P450 family 17 subfamily A member 1          | Cytoplasm           | enzyme                  |
| NM_001348.1    | DAPK3    | death-associated protein kinase 3                       | Cytoplasm           | kinase                  |
| NM_001923.3    | DDB1     | damage-specific DNA binding protein 1                   | Nucleus             | other                   |
| NM_018706.5    | DHTKD1   | dehydrogenase E1 and transketolase domain containing 1  | Cytoplasm           | enzyme                  |

|                |          |                                                             |                     |                         |
|----------------|----------|-------------------------------------------------------------|---------------------|-------------------------|
| NM_021931.2    | DHX35    | DEAH-box helicase 35                                        | Other               | enzyme                  |
| NM_003836.5    | DLK1     | delta-like 1 homolog (Drosophila)                           | Extracellular Space | other                   |
| NM_015190.3    | DNAJC9   | DnaJ heat shock protein family (Hsp40) member C9            | Nucleus             | other                   |
| NM_139159.4    | DPP9     | dipeptidyl-peptidase 9                                      | Cytoplasm           | peptidase               |
| NM_001388.3    | DRG2     | developmentally regulated GTP binding protein 2             | Cytoplasm           | other                   |
| NM_006870.3    | DSTN     | destrin (actin depolymerizing factor)                       | Cytoplasm           | other                   |
| NM_004417.3    | DUSP1    | dual specificity phosphatase 1                              | Nucleus             | phosphatase             |
| NM_030640.2    | DUSP16   | dual specificity phosphatase 16                             | Nucleus             | phosphatase             |
| NM_004418.3    | DUSP2    | dual specificity phosphatase 2                              | Nucleus             | phosphatase             |
| NM_014183.2    | DYNLRB1  | dynein, light chain, roadblock-type 1                       | Cytoplasm           | other                   |
| NM_024007.3    | EBF1     | early B-cell factor 1                                       | Nucleus             | transcription regulator |
| NM_016938.3    | EFEMP2   | EGF containing fibulin-like extracellular matrix protein 2  | Extracellular Space | other                   |
| NM_022051.2    | EGLN1    | egl-9 family hypoxia-inducible factor 1                     | Cytoplasm           | enzyme                  |
| NM_001964.2    | EGR1     | early growth response 1                                     | Nucleus             | transcription regulator |
| NM_004681.2    | EIF1AY   | eukaryotic translation initiation factor 1A, Y-linked       | Other               | translation regulator   |
| NM_032025.3    | EIF2A    | eukaryotic translation initiation factor 2A                 | Cytoplasm           | translation regulator   |
| NM_001247.2    | ENTPD6   | ectonucleoside triphosphate diphosphohydrolase 6 (putative) | Cytoplasm           | enzyme                  |
| NM_006817.3    | ERP29    | endoplasmic reticulum protein 29                            | Cytoplasm           | transporter             |
| NM_004730.2    | ETF1     | eukaryotic translation termination factor 1                 | Cytoplasm           | translation regulator   |
| NM_001162422.1 | ETS1     | v-ets avian erythroblastosis virus E26 oncogene homolog 1   | Nucleus             | transcription regulator |
| NM_005239.4    | ETS2     | v-ets avian erythroblastosis virus E26 oncogene homolog 2   | Nucleus             | transcription regulator |
| NM_007177.2    | FAM107A  | family with sequence similarity 107 member A                | Nucleus             | other                   |
| NM_014612.3    | FAM120A  | family with sequence similarity 120A                        | Cytoplasm           | other                   |
| NM_176782.2    | FAM151A  | family with sequence similarity 151 member A                | Extracellular Space | other                   |
| NM_004111.4    | FEN1     | flap structure-specific endonuclease 1                      | Nucleus             | enzyme                  |
| NM_006832.2    | FERMT2   | fermitin family member 2                                    | Cytoplasm           | other                   |
| NM_207422.2    | FLJ44635 | TPT1-like protein                                           | Cytoplasm           | other                   |
| NM_013280.4    | FLRT1    | fibronectin leucine rich transmembrane protein 1            | Plasma Membrane     | other                   |
| NM_212475.1    | FN1      | fibronectin 1                                               | Extracellular Space | enzyme                  |
| NM_001114171.1 | FOSB     | FBJ murine osteosarcoma viral oncogene homolog B            | Nucleus             | transcription regulator |
| NM_001453.2    | FOXC1    | forkhead box C1                                             | Nucleus             | transcription regulator |
| NR_002201.1    | FTH1P3   | ferritin, heavy polypeptide 1 pseudogene 3                  | Other               | other                   |
| NM_000146.3    | FTL      | ferritin, light polypeptide                                 | Cytoplasm           | enzyme                  |
| NR_028388.2    | FUS      | FUS RNA binding protein                                     | Nucleus             | transcription regulator |
| NM_006581.3    | FUT9     | fucosyltransferase 9 (alpha (1,3) fucosyltransferase)       | Cytoplasm           | enzyme                  |
| NM_054110.4    | GALNT15  | polypeptide N-acetylgalactosaminyltransferase 15            | Cytoplasm           | enzyme                  |
| NR_027399.1    | GFOD2    | glucose-fructose oxidoreductase domain containing 2         | Extracellular Space | enzyme                  |
| NM_000165.3    | GJA1     | gap junction protein alpha 1                                | Plasma Membrane     | transporter             |
| NM_016194.3    | GNB5     | guanine nucleotide binding protein (G protein), beta 5      | Plasma Membrane     | enzyme                  |

|                |          |                                                                                                |                     |                         |
|----------------|----------|------------------------------------------------------------------------------------------------|---------------------|-------------------------|
| NM_002076.3    | GNS      | glucosamine (N-acetyl)-6-sulfatase                                                             | Cytoplasm           | enzyme                  |
| NM_016548.3    | GOLM1    | golgi membrane protein 1                                                                       | Cytoplasm           | other                   |
| NM_022130.3    | GOLPH3   | golgi phosphoprotein 3 (coat-protein)                                                          | Cytoplasm           | other                   |
| NM_005814.1    | GPA33    | glycoprotein A33                                                                               | Plasma Membrane     | other                   |
| NM_000581.2    | GPX1     | glutathione peroxidase 1                                                                       | Cytoplasm           | enzyme                  |
| NM_005315.1    | GSC2     | goosecoid homeobox 2                                                                           | Nucleus             | transcription regulator |
| NM_001127662.1 | GSN      | gelsolin                                                                                       | Extracellular Space | other                   |
| NM_000846.4    | GSTA2    | glutathione S-transferase alpha 2                                                              | Cytoplasm           | enzyme                  |
| NM_002101.3    | GYPC     | glycophorin C (Gerbich blood group)                                                            | Plasma Membrane     | other                   |
| NR_002196.1    | H19      | H19, imprinted maternally expressed transcript (non-protein coding)                            | Cytoplasm           | other                   |
| NM_001010989.1 | HERPUD1  | homocysteine-inducible, endoplasmic reticulum stress-inducible, ubiquitin-like domain member 1 | Cytoplasm           | other                   |
| NM_144608.1    | HEXIM2   | hexamethylene bis-acetamide inducible 2                                                        | Nucleus             | transcription regulator |
| NM_002116.6    | HLA-A    | major histocompatibility complex, class I, A                                                   | Plasma Membrane     | other                   |
| NM_019111.3    | HLA-DRA  | major histocompatibility complex, class II, DR alpha                                           | Plasma Membrane     | transmembrane receptor  |
| NM_001098272.1 | HMGCS1   | 3-hydroxy-3-methylglutaryl-CoA synthase 1                                                      | Cytoplasm           | enzyme                  |
| NM_001123366.1 | HMSD     | histocompatibility (minor) serpin domain containing                                            | Other               | other                   |
| NR_027297.1    | HOMER3   | homer scaffolding protein 3                                                                    | Plasma Membrane     | other                   |
| NM_006042.1    | HS3ST3A1 | heparan sulfate-glucosamine 3-sulfotransferase 3A1                                             | Cytoplasm           | enzyme                  |
| NM_003725.2    | HSD17B6  | hydroxysteroid (17-beta) dehydrogenase 6                                                       | Other               | enzyme                  |
| NM_002156.4    | HSPD1    | heat shock protein family D (Hsp60) member 1                                                   | Cytoplasm           | enzyme                  |
| NM_003897.3    | IER3     | immediate early response 3                                                                     | Cytoplasm           | other                   |
| NM_206949.2    | IFI27L1  | interferon, alpha-inducible protein 27-like 1                                                  | Other               | other                   |
| NM_032036.2    | IFI27L2  | interferon, alpha-inducible protein 27-like 2                                                  | Other               | other                   |
| NM_001548.3    | IFIT1    | interferon induced protein with tetratricopeptide repeats 1                                    | Cytoplasm           | other                   |
| NM_000877.2    | IL1R1    | interleukin 1 receptor, type I                                                                 | Plasma Membrane     | transmembrane receptor  |
| NM_002192.2    | INHBA    | inhibin beta A                                                                                 | Extracellular Space | growth factor           |
| NM_017759.4    | INO80D   | INO80 complex subunit D                                                                        | Other               | other                   |
| NR_003512.1    | INS-IGF2 | INS-IGF2 readthrough                                                                           | Other               | other                   |
| NM_198336.2    | INSIG1   | insulin induced gene 1                                                                         | Cytoplasm           | other                   |
| NM_001034841.3 | ITPRIPL2 | inositol 1,4,5-trisphosphate receptor interacting protein-like 2                               | Other               | other                   |
| NM_002228.3    | JUN      | jun proto-oncogene                                                                             | Nucleus             | transcription regulator |
| NM_005354.4    | JUND     | jun D proto-oncogene                                                                           | Nucleus             | transcription regulator |
| NM_138444.3    | KCTD12   | potassium channel tetramerization domain containing 12                                         | Plasma Membrane     | ion channel             |
| NM_020702.3    | KIAA1161 | KIAA1161                                                                                       | Nucleus             | other                   |
| NM_016270.2    | KLF2     | Kruppel-like factor 2                                                                          | Nucleus             | transcription regulator |
| NM_006148.2    | LASP1    | LIM and SH3 protein 1                                                                          | Cytoplasm           | transporter             |
| NM_001174097.1 | LDHB     | lactate dehydrogenase B                                                                        | Cytoplasm           | enzyme                  |



|                |           |                                                                             |                     |                            |
|----------------|-----------|-----------------------------------------------------------------------------|---------------------|----------------------------|
| NM_000527.3    | LDLR      | low density lipoprotein receptor                                            | Plasma Membrane     | transporter                |
| NM_024316.1    | LENG1     | leukocyte receptor cluster (LRC) member 1                                   | Other               | other                      |
| NR_027129.1    | LINC01547 | long intergenic non-protein coding RNA 1547                                 | Cytoplasm           | other                      |
| NR_028386.1    | LOC375196 | uncharacterized LOC375196                                                   | Other               | other                      |
| NM_015578.2    | LSM14A    | LSM14A mRNA processing body assembly factor                                 | Cytoplasm           | other                      |
| NM_001033667.1 | LY9       | lymphocyte antigen 9                                                        | Plasma Membrane     | other                      |
| NM_181705.2    | LYRM7     | LYR motif containing 7                                                      | Cytoplasm           | other                      |
| NM_153267.4    | MAMDC2    | MAM domain containing 2                                                     | Extracellular Space | other                      |
| NM_001177466.1 | MAMLD1    | mastermind like domain containing 1                                         | Other               | other                      |
| NM_005909.3    | MAP1B     | microtubule associated protein 1B                                           | Cytoplasm           | other                      |
| NM_025052.3    | MAP3K19   | mitogen-activated protein kinase kinase kinase 19                           | Other               | kinase                     |
| NM_002382.3    | MAX       | MYC associated factor X                                                     | Nucleus             | transcription regulator    |
| NM_201542.3    | MED8      | mediator complex subunit 8                                                  | Nucleus             | other                      |
| NM_014033.3    | METTL7A   | methyltransferase like 7A                                                   | Cytoplasm           | other                      |
| NR_024275.1    | MGAT5     | mannosyl (alpha-1,6-)-glycoprotein beta-1,6-N-acetylglucosaminyltransferase | Cytoplasm           | enzyme                     |
| NR_027906.1    | MLLT4-AS1 | MLLT4 antisense RNA 1 (head to head)                                        | Other               | other                      |
| NR_002946.1    | MMP23A    | matrix metalloproteinase 23A (pseudogene)                                   | Extracellular Space | other                      |
| NM_145330.2    | MRPL33    | mitochondrial ribosomal protein L33                                         | Cytoplasm           | other                      |
| NM_006745.3    | MSMO1     | methylsterol monooxygenase 1                                                | Cytoplasm           | enzyme                     |
| NM_016332.2    | MSRB1     | methionine sulfoxide reductase B1                                           | Other               | other                      |
| NM_004686.4    | MTMR7     | myotubularin related protein 7                                              | Cytoplasm           | phosphatase                |
| NM_001008528.1 | MXRA7     | matrix-remodelling associated 7                                             | Other               | other                      |
| NM_021019.3    | MYL6      | myosin light chain 6                                                        | Cytoplasm           | other                      |
| NM_021019.3    | MYL6      | myosin light chain 6                                                        | Cytoplasm           | other                      |
| NM_001161819.1 | MYO1B     | myosin IB                                                                   | Cytoplasm           | other                      |
| NM_181351.3    | NCAM1     | neural cell adhesion molecule 1                                             | Plasma Membrane     | other                      |
| NM_002486.4    | NCBP1     | nuclear cap binding protein subunit 1                                       | Nucleus             | other                      |
| NM_181782.3    | NCOA7     | nuclear receptor coactivator 7                                              | Nucleus             | transcription regulator    |
| NM_006312.3    | NCOR2     | nuclear receptor corepressor 2                                              | Nucleus             | transcription regulator    |
| NM_201535.1    | NDRG2     | NDRG family member 2                                                        | Cytoplasm           | other                      |
| NM_031232.3    | NECAB3    | N-terminal EF-hand calcium binding protein 3                                | Cytoplasm           | other                      |
| NM_003204.2    | NFE2L1    | nuclear factor, erythroid 2 like 1                                          | Nucleus             | transcription regulator    |
| NM_001134673.3 | NFIA      | nuclear factor I/A                                                          | Nucleus             | transcription regulator    |
| NM_014380.1    | NGFRAP1   | nerve growth factor receptor (TNFRSF16) associated protein 1                | Cytoplasm           | other                      |
| NM_004808.2    | NMT2      | N-myristoyltransferase 2                                                    | Cytoplasm           | enzyme                     |
| NM_003995.3    | NPR2      | natriuretic peptide receptor 2                                              | Plasma Membrane     | G-protein coupled receptor |
| NM_001144772.1 | NSMAF     | neutral sphingomyelinase activation associated factor                       | Cytoplasm           | other                      |

|                |          |                                                                    |                     |                            |
|----------------|----------|--------------------------------------------------------------------|---------------------|----------------------------|
| NM_001081491.1 | NXF1     | nuclear RNA export factor 1                                        | Nucleus             | transporter                |
| NM_033014.2    | OGN      | osteoglycin                                                        | Extracellular Space | growth factor              |
| NM_181672.2    | OGT      | O-linked N-acetylglucosamine (GlcNAc) transferase                  | Cytoplasm           | enzyme                     |
| NM_001005471.1 | OR2T6    | olfactory receptor family 2 subfamily T member 6                   | Plasma Membrane     | G-protein coupled receptor |
| NM_001004699.1 | OR2Z1    | olfactory receptor family 2 subfamily Z member 1                   | Plasma Membrane     | G-protein coupled receptor |
| NM_002553.2    | ORC5     | origin recognition complex subunit 5                               | Nucleus             | other                      |
| NM_002556.2    | OSBP     | oxysterol binding protein                                          | Cytoplasm           | transporter                |
| NM_001136157.1 | OTUD5    | OTU deubiquitinase 5                                               | Cytoplasm           | enzyme                     |
| NM_148962.4    | OXER1    | oxoeicosanoid (OXE) receptor 1                                     | Plasma Membrane     | G-protein coupled receptor |
| NM_000430.3    | PAFAH1B1 | platelet activating factor acetylhydrolase 1b regulatory subunit 1 | Cytoplasm           | enzyme                     |
| NM_016297.3    | PCYOX1   | prenylcysteine oxidase 1                                           | Cytoplasm           | enzyme                     |
| NM_002599.3    | PDE2A    | phosphodiesterase 2A                                               | Cytoplasm           | enzyme                     |
| NR_028444.1    | PDIA5    | protein disulfide isomerase family A member 5                      | Cytoplasm           | enzyme                     |
| NM_001029891.2 | PGAM4    | phosphoglycerate mutase family member 4                            | Cytoplasm           | phosphatase                |
| NM_012396.3    | PHLDA3   | pleckstrin homology-like domain, family A, member 3                | Plasma Membrane     | other                      |
| NM_015993.2    | PLLP     | plasmolipin                                                        | Plasma Membrane     | transporter                |
| NM_003713.3    | PLPP3    | phospholipid phosphatase 3                                         | Plasma Membrane     | phosphatase                |
| NM_015103.2    | PLXND1   | plexin D1                                                          | Plasma Membrane     | transmembrane receptor     |
| NM_006231.2    | POLE     | polymerase (DNA directed), epsilon, catalytic subunit              | Nucleus             | enzyme                     |
| NR_027390.1    | POLR2M   | polymerase (RNA) II (DNA directed) polypeptide M                   | Nucleus             | other                      |
| NM_001018161.1 | PON2     | paraoxonase 2                                                      | Plasma Membrane     | enzyme                     |
| NM_004575.2    | POU4F2   | POU class 4 homeobox 2                                             | Nucleus             | transcription regulator    |
| NM_000942.4    | PPIB     | peptidylprolyl isomerase B                                         | Cytoplasm           | enzyme                     |
| NM_032902.5    | PPP1R16A | protein phosphatase 1 regulatory subunit 16A                       | Plasma Membrane     | other                      |
| NM_002574.2    | PRDX1    | peroxiredoxin 1                                                    | Cytoplasm           | enzyme                     |
| NM_014098.2    | PRDX3    | peroxiredoxin 3                                                    | Cytoplasm           | enzyme                     |
| NM_002734.3    | PRKAR1A  | protein kinase, cAMP-dependent, regulatory subunit type I alpha    | Cytoplasm           | kinase                     |
| NM_002764.3    | PRPS1    | phosphoribosyl pyrophosphate synthetase 1                          | Cytoplasm           | kinase                     |
| NM_000314.4    | PTEN     | phosphatase and tensin homolog                                     | Cytoplasm           | phosphatase                |
| NM_012232.5    | PTRF     | polymerase I and transcript release factor                         | Nucleus             | transcription regulator    |
| NM_138774.3    | R3HDM4   | R3H domain containing 4                                            | Other               | other                      |
| NM_014999.2    | RAB21    | RAB21, member RAS oncogene family                                  | Cytoplasm           | enzyme                     |
| NM_001142624.2 | RAB34    | RAB34, member RAS oncogene family                                  | Cytoplasm           | enzyme                     |
| NM_006861.6    | RAB35    | RAB35, member RAS oncogene family                                  | Cytoplasm           | enzyme                     |
| NM_001031834.1 | RAB40AL  | RAB40A, member RAS oncogene family-like                            | Plasma Membrane     | other                      |
| NM_012415.2    | RAD54B   | RAD54 homolog B ( <i>S. cerevisiae</i> )                           | Nucleus             | enzyme                     |

|                 |          |                                                                                             |                     |                       |
|-----------------|----------|---------------------------------------------------------------------------------------------|---------------------|-----------------------|
| NM_015646.4     | RAP1B    | RAP1B, member of RAS oncogene family                                                        | Cytoplasm           | enzyme                |
| NM_006910.4     | RBBP6    | retinoblastoma binding protein 6                                                            | Nucleus             | enzyme                |
| NM_005822.2     | RCAN2    | regulator of calcineurin 2                                                                  | Other               | other                 |
| NM_020663.3     | RHOJ     | ras homolog family member J                                                                 | Cytoplasm           | enzyme                |
| NM_022780.3     | RMND5A   | required for meiotic nuclear division 5 homolog A                                           | Nucleus             | other                 |
| NM_018434.4     | RNF130   | ring finger protein 130                                                                     | Cytoplasm           | peptidase             |
| NM_001010858.2  | RNF187   | ring finger protein 187                                                                     | Nucleus             | enzyme                |
| NM_000988.3     | RPL27    | ribosomal protein L27                                                                       | Cytoplasm           | other                 |
| NM_001000.2     | RPL39    | ribosomal protein L39                                                                       | Cytoplasm           | other                 |
| NM_001025.4     | RPS23    | ribosomal protein S23                                                                       | Cytoplasm           | translation regulator |
| NM_00113559.2.2 | RPS27A   | ribosomal protein S27a                                                                      | Cytoplasm           | other                 |
| NM_015920.3     | RPS27L   | ribosomal protein S27 like                                                                  | Cytoplasm           | translation regulator |
| NM_001006.3     | RPS3A    | ribosomal protein S3A                                                                       | Nucleus             | other                 |
| NM_152682.2     | RWDD4    | RWD domain containing 4                                                                     | Other               | other                 |
| NM_005979.2     | S100A13  | S100 calcium binding protein A13                                                            | Cytoplasm           | other                 |
| NM_002970.2     | SAT1     | spermidine/spermine N1-acetyltransferase 1                                                  | Cytoplasm           | enzyme                |
| NM_006918.4     | SC5D     | sterol-C5-desaturase                                                                        | Cytoplasm           | enzyme                |
| NM_004719.2     | SCAF11   | SR-related CTD-associated factor 11                                                         | Nucleus             | other                 |
| NM_173833.4     | SCARA5   | scavenger receptor class A member 5                                                         | Cytoplasm           | other                 |
| NM_00103758.2.2 | SCD5     | stearoyl-CoA desaturase 5                                                                   | Cytoplasm           | enzyme                |
| NM_002979.3     | SCP2     | sterol carrier protein 2                                                                    | Cytoplasm           | transporter           |
| NM_014300.2     | SEC11A   | SEC11 homolog A, signal peptidase complex subunit                                           | Cytoplasm           | peptidase             |
| NM_00109372.6.1 | SEPP1    | selenoprotein P, plasma, 1                                                                  | Extracellular Space | other                 |
| NM_004155.4     | SERPINB9 | serpin peptidase inhibitor, clade B (ovalbumin), member 9                                   | Cytoplasm           | other                 |
| NM_053282.4     | SH2D1B   | SH2 domain containing 1B                                                                    | Cytoplasm           | other                 |
| NM_00101799.5.2 | SH3PXD2B | SH3 and PX domains 2B                                                                       | Cytoplasm           | other                 |
| NM_00114628.1.1 | SHBG     | sex hormone-binding globulin                                                                | Extracellular Space | other                 |
| NM_00100664.1.1 | SLC25A25 | solute carrier family 25 (mitochondrial carrier; phosphate carrier), member 25              | Cytoplasm           | transporter           |
| NM_001152.4     | SLC25A5  | solute carrier family 25 (mitochondrial carrier; adenine nucleotide translocator), member 5 | Cytoplasm           | transporter           |
| NM_003039.2     | SLC2A5   | solute carrier family 2 (facilitated glucose/fructose transporter), member 5                | Plasma Membrane     | transporter           |
| NM_007001.2     | SLC35D2  | solute carrier family 35 (UDP-GlcNAc/UDP-glucose transporter), member D2                    | Cytoplasm           | transporter           |
| NM_152462.2     | SLC35G3  | solute carrier family 35 member G3                                                          | Other               | enzyme                |
| NM_018976.4     | SLC38A2  | solute carrier family 38 member 2                                                           | Plasma Membrane     | transporter           |
| NM_00113591.9.1 | SLC46A3  | solute carrier family 46 member 3                                                           | Extracellular Space | other                 |
| NM_018121.3     | SLF2     | SMC5-SMC6 complex localization factor 2                                                     | Extracellular Space | other                 |
| NM_007159.2     | SLMAP    | sarcolemma associated protein                                                               | Plasma Membrane     | other                 |
| NM_00114543.2.1 | SMIM20   | small integral membrane protein 20                                                          | Other               | other                 |
| NM_00112476.7.1 | SMIM4    | small integral membrane protein 4                                                           | Cytoplasm           | other                 |
| NM_013306.3     | SNX15    | sorting nexin 15                                                                            | Cytoplasm           | transporter           |

|                    |           |                                                                                    |                     |                            |
|--------------------|-----------|------------------------------------------------------------------------------------|---------------------|----------------------------|
| NM_003877.3        | SOCS2     | suppressor of cytokine signaling 2                                                 | Cytoplasm           | other                      |
| NM_003955.3        | SOCS3     | suppressor of cytokine signaling 3                                                 | Cytoplasm           | phosphatase                |
| NM_000454.4        | SOD1      | superoxide dismutase 1, soluble                                                    | Cytoplasm           | enzyme                     |
| NM_00100384<br>5.2 | SP5       | Sp5 transcription factor                                                           | Nucleus             | other                      |
| NM_004684.4        | SPARCL1   | SPARC like 1                                                                       | Extracellular Space | other                      |
| NM_178313.2        | SPTBN1    | spectrin beta, non-erythrocytic 1                                                  | Plasma Membrane     | other                      |
| NM_00101369<br>4.2 | SRRD      | SRR1 domain containing                                                             | Other               | other                      |
| NM_006925.3        | SRSF5     | serine/arginine-rich splicing factor 5                                             | Nucleus             | other                      |
| NM_024636.2        | STEAP4    | STEAP4 metalloreductase                                                            | Plasma Membrane     | enzyme                     |
| NM_004099.4        | STOM      | stomatin                                                                           | Plasma Membrane     | other                      |
| NM_003569.2        | STX7      | syntaxin 7                                                                         | Plasma Membrane     | transporter                |
| NM_031914.2        | SYT16     | synaptotagmin 16                                                                   | Other               | transporter                |
| NM_003967.2        | TAAR5     | trace amine associated receptor 5                                                  | Plasma Membrane     | G-protein coupled receptor |
| NM_004607.2        | TBCA      | tubulin folding cofactor A                                                         | Cytoplasm           | other                      |
| NM_153333.2        | TCEAL8    | transcription elongation factor A (SII)-like 8                                     | Other               | other                      |
| NM_153035.1        | TCEANC2   | transcription elongation factor A (SII) N-terminal and central domain containing 2 | Other               | other                      |
| NM_138501.4        | TECR      | trans-2,3-enoyl-CoA reductase                                                      | Plasma Membrane     | enzyme                     |
| NM_016020.2        | TFB1M     | transcription factor B1, mitochondrial                                             | Cytoplasm           | transcription regulator    |
| NM_00102484<br>7.2 | TGFBR2    | transforming growth factor beta receptor II                                        | Plasma Membrane     | kinase                     |
| NR_028383.1        | TIMM8B    | translocase of inner mitochondrial membrane 8 homolog B (yeast)                    | Cytoplasm           | transporter                |
| NM_000362.4        | TIMP3     | TIMP metalloproteinase inhibitor 3                                                 | Extracellular Space | other                      |
| NM_014742.3        | TM9SF4    | transmembrane 9 superfamily protein member 4                                       | Cytoplasm           | transporter                |
| NM_152468.4        | TMC8      | transmembrane channel like 8                                                       | Cytoplasm           | other                      |
| NR_002807.3        | TMED10P1  | transmembrane emp24-like trafficking protein 10 (yeast) pseudogene 1               | Other               | other                      |
| NM_032323.2        | TMEM79    | transmembrane protein 79                                                           | Cytoplasm           | other                      |
| NM_006290.2        | TNFAIP3   | TNF alpha induced protein 3                                                        | Nucleus             | enzyme                     |
| NM_003842.4        | TNFRSF10B | tumor necrosis factor receptor superfamily member 10b                              | Plasma Membrane     | transmembrane receptor     |
| NM_022748.10       | TNS3      | tensin 3                                                                           | Plasma Membrane     | phosphatase                |
| NM_00103733<br>0.1 | TRIM16L   | tripartite motif containing 16-like                                                | Other               | other                      |
| NM_016113.3        | TRPV2     | transient receptor potential cation channel, subfamily V, member 2                 | Plasma Membrane     | ion channel                |
| NM_004089.3        | TSC22D3   | TSC22 domain family member 3                                                       | Nucleus             | transcription regulator    |
| NM_030935.3        | TSC22D4   | TSC22 domain family member 4                                                       | Nucleus             | transcription regulator    |
| NM_173485.4        | TSHZ2     | teashirt zinc finger homeobox 2                                                    | Other               | other                      |
| NM_005723.3        | TSPAN5    | tetraspanin 5                                                                      | Plasma Membrane     | other                      |
| NR_001545.2        | TTY15     | testis-specific transcript, Y-linked 15 (non-protein coding)                       | Other               | other                      |

|                |        |                                                              |                     |                         |
|----------------|--------|--------------------------------------------------------------|---------------------|-------------------------|
| NM_006009.2    | TUBA1A | tubulin alpha 1a                                             | Cytoplasm           | other                   |
| NM_172070.3    | UBR3   | ubiquitin protein ligase E3 component n-recogin 3 (putative) | Other               | enzyme                  |
| NM_080911.1    | UNG    | uracil DNA glycosylase                                       | Nucleus             | enzyme                  |
| NM_004654.3    | USP9Y  | ubiquitin specific peptidase 9, Y-linked                     | Cytoplasm           | peptidase               |
| NM_003374.1    | VDAC1  | voltage dependent anion channel 1                            | Cytoplasm           | ion channel             |
| NM_030938.3    | VMP1   | vacuole membrane protein 1                                   | Plasma Membrane     | other                   |
| NM_006646.5    | WASF3  | WAS protein family member 3                                  | Cytoplasm           | other                   |
| NM_003881.2    | WISP2  | WNT1 inducible signaling pathway protein 2                   | Extracellular Space | growth factor           |
| NM_014263.2    | YME1L1 | YME1 like 1 ATPase                                           | Cytoplasm           | peptidase               |
| NM_024784.3    | ZBTB3  | zinc finger and BTB domain containing 3                      | Nucleus             | other                   |
| NM_003407.2    | ZFP36  | ZFP36 ring finger protein                                    | Nucleus             | transcription regulator |
| NM_173832.3    | ZFP41  | ZFP41 zinc finger protein                                    | Nucleus             | other                   |
| NM_024620.3    | ZNF329 | zinc finger protein 329                                      | Other               | other                   |
| NM_207341.2    | ZP1    | zona pellucida glycoprotein 1                                | Extracellular Space | other                   |
| XM_002346324.1 |        | unknown                                                      | unknown             | unknown                 |
| XR_038342.2    |        | unknown                                                      | unknown             | unknown                 |
| XR_078642.1    |        | unknown                                                      | unknown             | unknown                 |
| XR_079072.1    |        | unknown                                                      | unknown             | unknown                 |

Supplementary Table S3. Genes up-regulated in Cluster B involved in cell death

| Categories              | Functions Annotation          | p-Value  | Activation z-score | Molecules                                                                                                                                                                                                                                                                                                                                                                                                                                                                                                                                                                                                                       |
|-------------------------|-------------------------------|----------|--------------------|---------------------------------------------------------------------------------------------------------------------------------------------------------------------------------------------------------------------------------------------------------------------------------------------------------------------------------------------------------------------------------------------------------------------------------------------------------------------------------------------------------------------------------------------------------------------------------------------------------------------------------|
| Cell Death and Survival | apoptosis of tumor cell lines | 8,69E-11 | -1,003             | ACVR1B,ATF3,B2M,BCL2,BTG2,CAV1,CCND3,CD99,CDC42,CEBPD,COX8A,CYB5A,DAPK3,DUSP1,EBF1,EGR1,EIF2A,ETS1,ETS2,FN1,FOSB,GJA1,GPX1,GSN,GSTA2,HSPD1,IER3,IL1R1,INHBA,JUN,JUND,KLF2,MAX,NCAM1,NDRG2,NFE2L1,OGT,PRDX1,PRKAR1A,PRPS1,PTEN,RBBP6,RHOJ,SAT1,SLC25A5,SOCS3,SOD1,TGFBR2,TIMP3,TNFAIP3,TNFRSF10B,TSC22D3,TUBA1A,VDAC1                                                                                                                                                                                                                                                                                                            |
| Cell Death and Survival | cell death                    | 1,34E-09 | -1,115             | ACVR1B,AK1,ALDH2,ALDOA,ANXA5,ARL6IP5,ATF3,B2M,BCL2,BSG,BTG2,CAV1,CCND3,CCT5,CD6,CD99,CDC42,CEBPD,CFB,CFI,CHMP3,COL5A3,COX8A,CSTB,CYB5A,CYP11A1,DAPK3,DLK1,DPP9,DUSP1,DUSP2,EBF1,EGLN1,EGR1,EIF2A,ETS1,ETS2,FEN1,FN1,FOSB,FUS,GJA1,GPX1,GSN,GSTA2,HERPUD1,HLA-A,HSPD1,IER3,IL1R1,INHBA,JUN,JUND,KLF2,LDLR,LY9,MAP1B,MAX,MGAT5,NCAM1,NCOR2,NDRG2,NFE2L1,NGFRAP1,NSMAF,OGT,PAFAH1B1,PHLDA3,PON2,POU4F2,PPIB,PRDX1,PRDX3,PRKAR1A,PRPS1,PTEN,RAB35,RAP1B,RBBP6,RCAN2,RHOJ,RNF130,RPS3A,SAT1,SCP2,SEPP1,SERPINB9,SH2D1B,SHBG,SLC25A5,SOCS2,SOCS3,SOD1,SPTBN1,STOM,TFB1M,TGFBR2,TIMP3,TNFAIP3,TNFRSF10B,TSC22D3,TUBA1A,UNG,VDAC1,ZFP36 |
| Cell Death and Survival | apoptosis                     | 1,88E-09 | -1,577             | ACVR1B,ALDH2,ALDOA,ANXA5,ARL6IP5,ATF3,B2M,BCL2,BSG,BTG2,CAV1,CCND3,CD99,CDC42,CEBPD,COL5A3,COX8A,CSTB,CYB5A,CYP11A1,DAPK3,DPP9,DUSP1,DUSP2,EBF1,EGR1,EIF2A,ETS1,ETS2,FEN1,FN1,FOSB,FUS,GJA1,GPX1,GSN,GSTA2,HERPUD1,HSPD1,IER3,IL1R1,INHBA,JUN,JUND,KLF2,LDLR,MAP1B,MAX,NCAM1,NCOR2,NDRG2,NFE2L1,NGFRAP1,NSMAF,OGT,PAFAH1B1,PHLDA3,PON2,PRDX1,PRDX3,PRKAR1A,PRPS1,PTEN,RAP1B,RBBP6,RCAN2,RHOJ,RNF130,RPS3A,SAT1,SEPP1,SERPINB9,SHBG,SLC25A5,SOCS2,SOCS3,SOD1,SPTBN1,TFB1M,TGFBR2,TIMP3,TNFAIP3,TNFRSF10B,TSC22D3,TUBA1                                                                                                           |

|                                                                           |                                         |          |        |                                                                                                                                                                                                                                                                                                                                                                                                                                                                                                                        |
|---------------------------------------------------------------------------|-----------------------------------------|----------|--------|------------------------------------------------------------------------------------------------------------------------------------------------------------------------------------------------------------------------------------------------------------------------------------------------------------------------------------------------------------------------------------------------------------------------------------------------------------------------------------------------------------------------|
|                                                                           |                                         |          |        | A,UNG,VDAC1,ZFP36                                                                                                                                                                                                                                                                                                                                                                                                                                                                                                      |
| Cell Death and Survival                                                   | cell death of tumor cell lines          | 2,05E-09 | -1,876 | ACVR1B,ATF3,B2M,BCL2,BTG2,CAV1,CCND3,CT5,CD99,CDC42,CEBPD,COX8A,CYB5A,DAPK3,DPP9,DUSP1,EBF1,EGLN1,EGR1,EIF2A,ETS1,ETS2,FEN1,FN1,FOSB,GJA1,GPX1,GSN,GSTA2,HERPUD1,HSPD1,IER3,IL1R1,INHBA,JUN,JUND,KLF2,MAX,NCAM1,NDRG2,NFE2L1,OGT,PRDX1,PRKAR1A,PRPS1,PTEN,RAB35,RBBP6,RHOJ,SAT1,SLC25A5,SOCS3,SOD1,TGFBR2,TIMP3,TNFAIP3,TNFRSF10B,TSC22D3,TUBA1A,VDAC1                                                                                                                                                                 |
| Cell Death and Survival                                                   | necrosis                                | 4,29E-09 | -1,553 | ACVR1B,ALDH2,ALDOA,ATF3,B2M,BCL2,BSG,BTG2,CAV1,CCND3,CCT5,CD99,CDC42,CEBPD,COL5A3,COX8A,CYB5A,CYP11A1,DAPK3,DLK1,DPP9,DUSP1,EBF1,EGLN1,EGR1,EIF2A,ETS1,ETS2,FEN1,FN1,FOSB,FUS,GJA1,GPX1,GSN,GSTA2,HERPUD1,HSPD1,IER3,IL1R1,INHBA,JUN,JUND,KLF2,LDLR,MAP1B,MAX,MGAT5,NCAM1,NCOR2,NDRG2,NFE2L1,NGFRAP1,NSMAF,OGT,PAFAH1B1,PON2,POU4F2,PRDX1,PRDX3,PRKAR1A,PRPS1,PTEN,RAB35,RBBP6,RCAN2,RHOJ,RPS3A,SAT1,SCP2,SEPP1,SERPINB9,SLC25A5,SOCS3,SOD1,SPTBN1,TFB1M,TGFBR2,TIMP3,TNFAIP3,TNFRSF10B,TSC22D3,TUBA1A,UNG,VDAC1,ZFP36 |
| Cell Death and Survival                                                   | cytolysis                               | 3,55E-07 | -1,628 | AK1,ALDOA,B2M,BCL2,CAV1,CFB,CFI,ETS1,GJA1,GPX1,HLA-A,LY9,PRDX1,SERPINB9,SH2D1B,STOM,TGFBR2,TNFRSF10B                                                                                                                                                                                                                                                                                                                                                                                                                   |
| Cell Death and Survival                                                   | necrosis of epithelial tissue           | 1,09E-06 | -0,084 | ALDH2,ATF3,BCL2,CAV1,CDC42,CEBPD,EGR1,GPX1,HSPD1,IER3,INHBA,JUN,KLF2,LDLR,MAX,NDRG2,PRDX3,PTEN,SEPP1,SLC25A5,SOCS3,SOD1,SPTBN1,TGFBR2,TIMP3,TNFAIP3,TNFRSF10B,VDAC1                                                                                                                                                                                                                                                                                                                                                    |
| Cell Death and Survival                                                   | apoptosis of leukemia cell lines        | 1,97E-06 | -0,351 | B2M,BCL2,CAV1,CEBPD,DUSP1,EIF2A,GSN,GSTA2,INHBA,JUN,MAX,OGT,PTEN,SOCS3,TNFAIP3,TNFRSF10B,TSC22D3                                                                                                                                                                                                                                                                                                                                                                                                                       |
| Cell Death and Survival                                                   | apoptosis of prostate cancer cell lines | 2,34E-06 | -0,004 | BCL2,CAV1,EGR1,ETS2,FN1,HSPD1,INHBA,JUN,PRKAR1A,PTEN,SLC25A5,SOCS3,TNFRSF10B                                                                                                                                                                                                                                                                                                                                                                                                                                           |
| Cell Death and Survival                                                   | cell death of leukemia cell lines       | 3,22E-06 | -0,550 | B2M,BCL2,CAV1,CD99,CEBPD,DUSP1,EIF2A,GSN,GSTA2,INHBA,JUN,MAX,OGT,PTEN,SOCS3,TNFAIP3,TNFRSF10B,TSC22D3                                                                                                                                                                                                                                                                                                                                                                                                                  |
| Cell Death and Survival, Hair and Skin Development and Function           | cell viability of epithelial cell lines | 2,00E-05 | 2,158  | BCL2,BTG2,CALB2,CAV1,CDC42,CEBPD,JUN,TNFAIP3                                                                                                                                                                                                                                                                                                                                                                                                                                                                           |
| Cell Death and Survival, Gastrointestinal Disease, Hepatic System Disease | necrosis of liver                       | 2,43E-05 | -1,663 | BCL2,HSPD1,IER3,INHBA,JUN,JUND,LDLR,NFE2L1,SEPP1,SLC25A5,SOCS3,SOD1,SPTBN1,TIMP3                                                                                                                                                                                                                                                                                                                                                                                                                                       |
| Cell Death and Survival                                                   | cell death of epithelial cells          | 3,39E-05 | 1,502  | ATF3,BCL2,CDC42,CEBPD,EGR1,HSPD1,IER3,INHBA,JUN,LDLR,NDRG2,PRDX3,PTEN,SEPP1,SLC25A5,SOCS3,SOD1,SPTBN1,TGFBR2,TIMP3,TNFRSF10B,VDAC1                                                                                                                                                                                                                                                                                                                                                                                     |
| Cell Death and Survival                                                   | anoikis of tumor cell lines             | 3,73E-05 | 0,714  | BCL2,CAV1,CD99,FN1,PTEN,TNFRSF10B                                                                                                                                                                                                                                                                                                                                                                                                                                                                                      |
| Cell Death and Survival                                                   | cell death of cortical neurons          | 4,24E-05 | 0,558  | BCL2,CDC42,DUSP1,ETS2,FUS,HSPD1,IL1R1,JUN,MAP1B,NGFRAP1,UNG                                                                                                                                                                                                                                                                                                                                                                                                                                                            |
| Cancer, Cell Death and Survival, Tumor Morphology                         | cell death of tumor cells               | 4,24E-05 | -0,042 | B2M,BCL2,BSG,CAV1,CCND3,ETS1,INHBA,JUN,NCOR2,PON2,PTEN,RPS3A,SERPINB9,SOCS3,SOD1,TGFBR2,TNFRSF10B,ZFP36                                                                                                                                                                                                                                                                                                                                                                                                                |
| Cell Death and Survival, Gastrointestinal Disease, Hepatic System Disease | cell death of liver cells               | 4,40E-05 | -1,229 | BCL2,HSPD1,IER3,INHBA,JUN,JUND,LDLR,SEPP1,SLC25A5,SOCS3,SPTBN1,TIMP3                                                                                                                                                                                                                                                                                                                                                                                                                                                   |
| Cell Death and Survival                                                   | cell survival                           | 4,84E-05 | 4,749  | ATF3,BCL2,BTG2,CALB2,CARD10,CAV1,CDC42,CDH13,CEBPD,DLK1,DPP9,DRG2,DUSP1,EGR1,ETS2,FN1,GJA1,GPX1,HERPUD1,HSPD1,JUN,JUND,KLF2,MGAT5,MTMR7,NCAM1,NDRG2,NGFRAP1,OGT,POU4F2,PP1B,PRKAR1A,PTEN,RHOJ,RPL27,SERPINB9,SOCS2,SOCS3,SOD1,TGFBR2,TNFAIP3,TNFRSF10B,UNG,VDAC1,ZFP36                                                                                                                                                                                                                                                 |

|                                                                             |                                          |          |        |                                                                                                                                                                                                                                           |
|-----------------------------------------------------------------------------|------------------------------------------|----------|--------|-------------------------------------------------------------------------------------------------------------------------------------------------------------------------------------------------------------------------------------------|
| Cell Death and Survival                                                     | cell death of T lymphocytes              | 6,58E-05 | -1,384 | BCL2,CAV1,CD99,CDC42,EGR1,ETS1,ETS2,IER3,JUN,KLF2,OGT,PTEN,RCAN2,SERPINB9,TGFBR2,TSC22D3                                                                                                                                                  |
| Cell Death and Survival                                                     | apoptosis of vascular endothelial cells  | 7,08E-05 | -0,705 | ALDH2,ATF3,BCL2,CAV1,HSPD1,PTEN,TNFRSF10B,VDAC1                                                                                                                                                                                           |
| Cell Death and Survival                                                     | cell death of endothelial cells          | 7,75E-05 | -1,753 | ALDH2,ATF3,BCL2,CAV1,GPX1,HSPD1,KLF2,MAX,PTEN,TNFAIP3,TNFRSF10B,VDAC1                                                                                                                                                                     |
| Cell Death and Survival                                                     | killing of splenocytes                   | 8,58E-05 |        | BCL2,ETS1,SH2D1B                                                                                                                                                                                                                          |
| Cell Death and Survival                                                     | cell death of brain cells                | 9,70E-05 | 0,501  | BCL2,CDC42,DUSP1,EGR1,ETS2,FUS,HSPD1,IL1R1,JUN,MAP1B,NGFRAP1,PTEN,SOD1,UNG                                                                                                                                                                |
| Cell Death and Survival                                                     | neuronal cell death                      | 1,08E-04 | -0,674 | ATF3,BCL2,BTG2,CDC42,DUSP1,EGLN1,EGR1,ETS2,FN1,FUS,GJA1,GPX1,HERPUD1,HSPD1,IL1R1,INHBA,JUN,MAP1B,NGFRAP1,PAFAH1B1,POU4F2,PRDX3,PTEN,SOD1,TFB1M,UNG                                                                                        |
| Cell Death and Survival                                                     | apoptosis of sympathetic neuron          | 1,09E-04 | -0,818 | BCL2,CDC42,DUSP1,JUN,SOD1                                                                                                                                                                                                                 |
| Cell Death and Survival                                                     | apoptosis of liver                       | 1,24E-04 | -1,627 | BCL2,INHBA,JUN,JUND,DLDR,NFE2L1,SEPP1,SOCS3,SPTBN1,TIMP3                                                                                                                                                                                  |
| Cell Death and Survival                                                     | apoptosis of endothelial cells           | 1,30E-04 | -1,554 | ALDH2,ATF3,BCL2,CAV1,GPX1,HSPD1,MAX,PTEN,TNFAIP3,TNFRSF10B,VDAC1                                                                                                                                                                          |
| Cell Death and Survival                                                     | cell death of fibroblasts                | 1,44E-04 | -0,186 | ATF3,BCL2,CDC42,DUSP1,GPX1,JUN,JUND,KLF2,NSMAF,PTEN,TIMP3,TNFRSF10B,UNG                                                                                                                                                                   |
| Cell Death and Survival                                                     | cell death of carcinoma cell lines       | 1,53E-04 | -0,081 | BCL2,DAPK3,DUSP1,ETS2,GJA1,GPX1,JUN,KLF2,OGT,PRKAR1A,SOD1,TNFRSF10B                                                                                                                                                                       |
| Cell Death and Survival                                                     | cell death of cerebral cortex cells      | 1,65E-04 | 0,432  | BCL2,CDC42,DUSP1,ETS2,FUS,HSPD1,IL1R1,JUN,MAP1B,NGFRAP1,SOD1,UNG                                                                                                                                                                          |
| Cell Death and Survival                                                     | cell death of myeloma cell lines         | 1,81E-04 | -0,178 | B2M,BCL2,INHBA,JUN,NCAM1,PTEN,TNFRSF10B                                                                                                                                                                                                   |
| Cell Death and Survival                                                     | cell death of pre-oligodendrocytes       | 1,88E-04 |        | BCL2,SOD1                                                                                                                                                                                                                                 |
| Cell Death and Survival                                                     | apoptosis of T lymphocytes               | 1,93E-04 | -1,326 | BCL2,CAV1,CDC42,EGR1,ETS1,ETS2,IER3,JUN,KLF2,OGT,PTEN,RCAN2,SERPINB9,TSC22D3                                                                                                                                                              |
| Cell Death and Survival, Connective Tissue Disorders, Hematological Disease | hemolytic anemia                         | 1,94E-04 |        | AK1,ALDOA,CFB,CFL,GPX1,PRDX1,STOM                                                                                                                                                                                                         |
| Cell Death and Survival                                                     | cell death of immune cells               | 2,00E-04 | 0,004  | ATF3,BCL2,CAV1,CD99,CDC42,DLK1,EGR1,ETS1,ETS2,FN1,FUS,GSN,IER3,INHBA,JUN,KLF2,ILDR,MGAT5,OGT,PTEN,RCAN2,SERPINB9,TGFBR2,TNFAIP3,TSC22D3                                                                                                   |
| Cell Death and Survival                                                     | apoptosis of fibroblasts                 | 2,40E-04 | 0,280  | ATF3,BCL2,CDC42,DUSP1,JUN,JUND,KLF2,NSMAF,PTEN,TIMP3,TNFRSF10B                                                                                                                                                                            |
| Cell Death and Survival                                                     | cell death of connective tissue cells    | 2,45E-04 | -0,219 | ATF3,BCL2,CDC42,DUSP1,EGR1,EIF2A,ETS1,FN1,FUS,GPX1,GSN,HSPD1,IER3,JUN,JUND,KLF2,NSMAF,PTEN,SCP2,TIMP3,TNFAIP3,TNFRSF10B,UNG                                                                                                               |
| Cell Death and Survival                                                     | apoptosis of pheochromocytoma cell lines | 2,57E-04 | -1,638 | ATF3,BCL2,BTG2,CDC42,IL1R1,JUN,SOD1                                                                                                                                                                                                       |
| Cell Death and Survival                                                     | cell death of bone cancer cell lines     | 2,57E-04 | 0,454  | BCL2,CAV1,CD99,DPP9,ETS1,OGT,PRDX1,PRPS1,RBBP6,TNFRSF10B                                                                                                                                                                                  |
| Cell Death and Survival                                                     | cell viability                           | 2,60E-04 | 4,439  | BCL2,BTG2,CALB2,CARD10,CAV1,CDC42,CDH13,CEBPD,DLK1,DPP9,DRG2,DUSP1,EGR1,ETS2,FN1,GJA1,GPX1,HERPUD1,HSPD1,JUN,KLF2,MGAT5,MTMR7,NCAM1,OGT,POU4F2,PRKAR1A,PTEN,RHOJ,RPL27,SERPINB9,SOCS2,SOCS3,SOD1,TGFBR2,TNFAIP3,TNFRSF10B,UNG,VDAC1,ZFP36 |
| Cell Death and Survival                                                     | apoptosis of melanoma cell lines         | 2,67E-04 | -1,212 | BCL2,EGR1,ETS1,JUN,PRDX1,RHOJ,SAT1,TNFRSF10B                                                                                                                                                                                              |
| Cell Death and Survival                                                     | cell death of lymphoma cell lines        | 3,02E-04 | -1,239 | BCL2,BTG2,CCND3,CD99,DUSP1,EBF1,EGR1,GPX1,JUN,MAX,TNFRSF10B                                                                                                                                                                               |

|                                                                               |                                           |          |        |                                                                                                     |
|-------------------------------------------------------------------------------|-------------------------------------------|----------|--------|-----------------------------------------------------------------------------------------------------|
| Cell Death and Survival                                                       | apoptosis of brain                        | 3,41E-04 | 0,111  | BCL2,CDC42,DUSP1,EGR1,JUN,MAP1B,PTEN,SOD1,UNG                                                       |
| Cell Death and Survival                                                       | cytotoxicity                              | 3,48E-04 | -0,084 | B2M,BCL2,CD6,FN1,HLA-A,IL1R1,JUN,LDLR,PIIB,SOD1,TGFBR2,TNFAIP3                                      |
| Cell Death and Survival                                                       | cell death of pheochromocytoma cell lines | 3,52E-04 | -2,000 | ATF3,BCL2,BTG2,CDC42,HERPUD1,IL1R1,JUN,SOD1                                                         |
| Cell Death and Survival, Renal and Urological System Development and Function | cell viability of kidney cell lines       | 3,67E-04 | 0,128  | BCL2,CAV1,CEBPD,PTEN,TNFAIP3,VDAC1                                                                  |
| Cell Death and Survival                                                       | cell death of muscle cells                | 4,33E-04 | -1,070 | ALDOA,BCL2,CAV1,ETS1,GPX1,GSN,HSPD1,INHBA,JUND,PRDX3,PTEN,SOCS3,TIMP3,TNFAIP3,TNFRSF10B             |
| Cell Death and Survival                                                       | apoptosis of carcinoma cell lines         | 4,40E-04 | 0,291  | BCL2,DAPK3,DUSP1,ETS2,GJA1,GPX1,KLF2,OGT,PRKAR1A,TNFRSF10B                                          |
| Cell Death and Survival, Gastrointestinal Disease, Hepatic System Disease     | cell death of hepatocytes                 | 4,69E-04 | -0,958 | BCL2,INHBA,JUN,LDLR,SEPP1,SLC25A5,SOCS3,SPTBN1,TIMP3                                                |
| Cell Death and Survival, Gastrointestinal Disease, Hepatic System Disease     | apoptosis of liver cells                  | 5,11E-04 | -1,407 | BCL2,INHBA,JUN,JUND,LDLR,SEPP1,SOCS3,SPTBN1,TIMP3                                                   |
| Cell Death and Survival, Hematological System Development and Function        | survival of pre-T lymphocytes             | 5,58E-04 |        | BCL2,DLK1                                                                                           |
| Cell Death and Survival                                                       | apoptosis of myeloma cell lines           | 5,75E-04 | -0,577 | B2M,BCL2,JUN,NCAM1,PTEN,TNFRSF10B                                                                   |
| Cancer, Cell Death and Survival, Tumor Morphology                             | apoptosis of tumor cells                  | 6,54E-04 | 0,085  | B2M,BCL2,BSG,CAV1,CCND3,ETS1,JUN,NCOR2,PON2,PTEN,SOCS3,TGFBR2,TNFRSF10B                             |
| Cell Death and Survival, Gastrointestinal Disease, Hepatic System Disease     | apoptosis of hepatocytes                  | 6,77E-04 | -0,958 | BCL2,INHBA,JUN,LDLR,SEPP1,SOCS3,SPTBN1,TIMP3                                                        |
| Cancer, Cell Death and Survival, Tumor Morphology                             | apoptosis of melanoma cells               | 7,17E-04 |        | BCL2,ETS1,JUN,TNFRSF10B                                                                             |
| Cell Death and Survival                                                       | apoptosis of neurons                      | 7,18E-04 | -1,571 | ATF3,BCL2,BTG2,CDC42,DUSP1,EGR1,FN1,GPX1,HERPUD1,HSPD1,JUN,MAP1B,PAFAH1B1,PRDX3,SOD1,TFB1M,UNG      |
| Cell Death and Survival, Cellular Compromise                                  | toxicity of cells                         | 7,29E-04 | -0,270 | B2M,BCL2,CD6,FN1,HLA-A,IL1R1,JUN,LDLR,SOD1,TGFBR2,TNFAIP3                                           |
| Cell Death and Survival                                                       | apoptosis of leukocytes                   | 7,36E-04 | -1,115 | ATF3,BCL2,CAV1,CDC42,EGR1,ETS1,ETS2,GSN,IER3,JUN,KLF2,LDLR,OGT,PTEN,RCAN2,SERP1,NB9,TNFAIP3,TSC22D3 |
| Cell Death and Survival                                                       | cell death of endothelial cell lines      | 7,85E-04 | -2,236 | BCL2,FN1,GPX1,SOD1,TNFRSF10B                                                                        |
| Cell Death and Survival                                                       | apoptosis of fibroblast cell lines        | 8,55E-04 | 0,258  | ATF3,BCL2,EGR1,EIF2A,ETS1,FN1,FUS,GSN,HSPD1,IER3,JUN,PTEN,TNFAIP3,TNFRSF10B                         |



|                                                                       |                                               |          |        |                                                                        |
|-----------------------------------------------------------------------|-----------------------------------------------|----------|--------|------------------------------------------------------------------------|
| Cell Death and Survival                                               | apoptosis of muscle cells                     | 1,03E-03 | -0,812 | ALDOA,BCL2,GPX1,GSN,HSPD1,INHBA,JUND,PRDX3,PTEN,SOCS3,TIMP3,TNFAIP3    |
| Cell Death and Survival                                               | apoptosis of brain cells                      | 1,07E-03 | 0,399  | BCL2,CDC42,EGR1,JUN,MAP1B,PTEN,SOD1,UNG                                |
| Cell Death and Survival                                               | apoptosis of bone cancer cell lines           | 1,16E-03 | 0,747  | BCL2,CAV1,CD99,ETS1,OGT,PRPS1,RBBP6,TNFRSF10B                          |
| Cell Death and Survival                                               | apoptosis of smooth muscle cell lines         | 1,25E-03 |        | BCL2,ETS1,TNFRSF10B                                                    |
| Cell Death and Survival                                               | cell death of ganglion cells                  | 1,30E-03 |        | ATF3,BCL2,SOD1,TFB1M                                                   |
| Cancer, Cell Death and Survival, Tumor Morphology                     | cell death of mammary tumor cells             | 1,30E-03 |        | BCL2,CAV1,CCND3,JUN                                                    |
| Cancer, Cell Death and Survival, Tumor Morphology                     | apoptosis of lung cancer cells                | 1,51E-03 |        | PTEN,SOCS3,TNFRSF10B                                                   |
| Cell Death and Survival                                               | cell viability of stomach cancer cell lines   | 1,51E-03 |        | BCL2,CAV1,PTEN                                                         |
| Cell Death and Survival                                               | apoptosis of breast cancer cell lines         | 1,51E-03 | -0,955 | B2M,BCL2,CAV1,CYB5A,DUSP1,ETS2,FN1,HSPD1,IER3,JUN,PTEN,TNFRSF10B       |
| Cell Death and Survival                                               | cell viability of breast cancer cell lines    | 1,68E-03 | 2,752  | BCL2,BTG2,CARD10,CEBPD,DUSP1,GPX1,JUN,PTEN                             |
| Cell Death and Survival                                               | cellular degradation                          | 1,71E-03 | -1,425 | BCL2,CAV1,CHMP3,ETS2,GPX1,JUN,NCAM1,POU4F2,SOD1,TGFBR2,UNG             |
| Cell Death and Survival                                               | cell death of epithelial cell lines           | 1,72E-03 | 1,242  | ATF3,BCL2,CDC42,CEBPD,HSPD1,IER3,JUN,PRDX3,SOD1,TGFBR2,TNFRSF10B,VDAC1 |
| Cell Death and Survival                                               | apoptosis of connective tissue cells          | 1,81E-03 | -0,052 | ATF3,BCL2,CDC42,DUSP1,FN1,JUN,JUND,KLF2,NSMAF,PTEN,TIMP3,TNFRSF10B     |
| Cancer, Cell Death and Survival, Tumor Morphology                     | apoptosis of non-small-cell lung cancer cells | 1,83E-03 |        | PTEN,SOCS3                                                             |
| Cell Death and Survival                                               | apoptosis of epithelial cells                 | 2,06E-03 | 0,088  | BCL2,EGR1,INHBA,JUN,LDLR,NDRG2,PTEN,SEPP1,SOCS3,SPTBN1,TIMP3,TNFRSF10B |
| Cell Death and Survival, Reproductive System Development and Function | cell viability of breast cell lines           | 2,10E-03 |        | BTG2,DUSP1,ETS2                                                        |
| Cell Death and Survival                                               | cell death of breast cancer cell lines        | 2,12E-03 | -1,113 | B2M,BCL2,CAV1,CDC42,CYB5A,DUSP1,ETS2,FN1,HSPD1,IER3,JUN,PTEN,TNFRSF10B |
| Cell Death and Survival                                               | apoptosis of epithelial cell lines            | 2,13E-03 | 0,971  | ATF3,BCL2,CEBPD,HSPD1,IER3,JUN,PRDX3,TGFBR2,TNFRSF10B,VDAC1            |
| Cell Death and Survival, Cellular Compromise                          | cytotoxicity of cells                         | 2,19E-03 | -0,503 | B2M,BCL2,CD6,FN1,HLA-A,JUN,LDLR,SOD1,TGFBR2,TNFAIP3                    |
| Cell Death and Survival                                               | cell death of hepatoma cell lines             | 2,20E-03 | 0,992  | ACVR1B,BCL2,FOSB,INHBA,JUND,PTEN,SOD1,TNFRSF10B                        |

Supplementary Table S4. Genes up-regulated in both oligospermic and azoospermic patients

| ID      | Symbol  | Entrez Gene Name                                                                         | Location            | Type(s)                 |
|---------|---------|------------------------------------------------------------------------------------------|---------------------|-------------------------|
| ABI3BP  | ABI3BP  | ABI family member 3 binding protein                                                      | Extracellular Space | other                   |
| ACAP1   | ACAP1   | ArfGAP with coiled-coil, ankyrin repeat and PH domains 1                                 | Plasma Membrane     | other                   |
| ACSF2   | ACSF2   | acyl-CoA synthetase family member 2                                                      | Cytoplasm           | enzyme                  |
| ANKRD40 | ANKRD40 | ankyrin repeat domain 40                                                                 | Other               | other                   |
| ANXA5   | ANXA5   | annexin A5                                                                               | Plasma Membrane     | transporter             |
| AOX1    | AOX1    | aldehyde oxidase 1                                                                       | Cytoplasm           | enzyme                  |
| ARL6IP5 | ARL6IP5 | ADP ribosylation factor like GTPase 6 interacting protein 5                              | Cytoplasm           | other                   |
| ATP5C1  | ATP5C1  | ATP synthase, H <sup>+</sup> transporting, mitochondrial F1 complex, gamma polypeptide 1 | Cytoplasm           | transporter             |
| B2M     | B2M     | beta-2-microglobulin                                                                     | Plasma Membrane     | transmembrane receptor  |
| BRD3    | BRD3    | bromodomain containing 3                                                                 | Nucleus             | kinase                  |
| BTBD3   | BTBD3   | BTB (POZ) domain containing 3                                                            | Other               | other                   |
| BTG2    | BTG2    | BTG family member 2                                                                      | Nucleus             | transcription regulator |
| C2orf70 | C2orf70 | chromosome 2 open reading frame 70                                                       | Nucleus             | other                   |
| CAPZA2  | CAPZA2  | capping protein (actin filament) muscle Z-line, alpha 2                                  | Cytoplasm           | other                   |
| CAV1    | CAV1    | caveolin 1                                                                               | Plasma Membrane     | transmembrane receptor  |
| CD6     | CD6     | CD6 molecule                                                                             | Plasma Membrane     | transmembrane receptor  |
| CD63    | CD63    | CD63 molecule                                                                            | Plasma Membrane     | other                   |
| CEBPD   | CEBPD   | CCAAT/enhancer binding protein delta                                                     | Nucleus             | transcription regulator |
| CETN2   | CETN2   | centrin 2                                                                                | Nucleus             | enzyme                  |
| COX8A   | COX8A   | cytochrome c oxidase subunit VIIIA (ubiquitous)                                          | Cytoplasm           | enzyme                  |
| CSTB    | CSTB    | cystatin B                                                                               | Cytoplasm           | peptidase               |
| CYB5A   | CYB5A   | cytochrome b5 type A (microsomal)                                                        | Cytoplasm           | enzyme                  |
| DSTN    | DSTN    | destrin (actin depolymerizing factor)                                                    | Cytoplasm           | other                   |
| DUSP1   | DUSP1   | dual specificity phosphatase 1                                                           | Nucleus             | phosphatase             |
| DUSP16  | DUSP16  | dual specificity phosphatase 16                                                          | Nucleus             | phosphatase             |
| DYNLRB1 | DYNLRB1 | dynein, light chain, roadblock-type 1                                                    | Cytoplasm           | other                   |
| ETS1    | ETS1    | v-ets avian erythroblastosis virus E26 oncogene homolog 1                                | Nucleus             | transcription regulator |
| FERMT2  | FERMT2  | fermitin family member 2                                                                 | Cytoplasm           | other                   |
| FOXC1   | FOXC1   | forkhead box C1                                                                          | Nucleus             | transcription regulator |
| FTH1P3  | FTH1P3  | ferritin, heavy polypeptide 1 pseudogene 3                                               | Other               | other                   |
| FTL     | FTL     | ferritin, light polypeptide                                                              | Cytoplasm           | enzyme                  |
| FUS     | FUS     | FUS RNA binding protein                                                                  | Nucleus             | transcription regulator |
| GNB5    | GNB5    | guanine nucleotide binding protein (G protein), beta 5                                   | Plasma Membrane     | enzyme                  |
| GSN     | GSN     | gelsolin                                                                                 | Extracellular Space | other                   |
| GSTA2   | GSTA2   | glutathione S-transferase alpha 2                                                        | Cytoplasm           | enzyme                  |
| GYPC    | GYPC    | glycophorin C (Gerbich blood group)                                                      | Plasma Membrane     | other                   |
| HLA-DRA | HLA-DRA | major histocompatibility complex, class II, DR                                           | Plasma              | transmembrane           |

|          |          |                                                                    |                     |                            |
|----------|----------|--------------------------------------------------------------------|---------------------|----------------------------|
|          |          | alpha                                                              | Membrane            | receptor                   |
| HOMER3   | HOMER3   | homer scaffolding protein 3                                        | Plasma Membrane     | other                      |
| HSD17B6  | HSD17B6  | hydroxysteroid (17-beta) dehydrogenase 6                           | Other               | enzyme                     |
| INHBA    | INHBA    | inhibin beta A                                                     | Extracellular Space | growth factor              |
| INO80D   | INO80D   | INO80 complex subunit D                                            | Other               | other                      |
| INS-IGF2 | INS-IGF2 | INS-IGF2 readthrough                                               | Other               | other                      |
| ITPRIPL2 | ITPRIPL2 | inositol 1,4,5-trisphosphate receptor interacting protein-like 2   | Other               | other                      |
| JUN      | JUN      | jun proto-oncogene                                                 | Nucleus             | transcription regulator    |
| KCTD12   | KCTD12   | potassium channel tetramerization domain containing 12             | Plasma Membrane     | ion channel                |
| KLF2     | KLF2     | Kruppel-like factor 2                                              | Nucleus             | transcription regulator    |
| LDLR     | LDLR     | low density lipoprotein receptor                                   | Plasma Membrane     | transporter                |
| LSM14A   | LSM14A   | LSM14A mRNA processing body assembly factor                        | Cytoplasm           | other                      |
| LY9      | LY9      | lymphocyte antigen 9                                               | Plasma Membrane     | other                      |
| MAMLD1   | MAMLD1   | mastermind like domain containing 1                                | Other               | other                      |
| MAP1B    | MAP1B    | microtubule associated protein 1B                                  | Cytoplasm           | other                      |
| METTL7A  | METTL7A  | methyltransferase like 7A                                          | Cytoplasm           | other                      |
| MSMO1    | MSMO1    | methylsterol monooxygenase 1                                       | Cytoplasm           | enzyme                     |
| MYO1B    | MYO1B    | myosin IB                                                          | Cytoplasm           | other                      |
| NCAM1    | NCAM1    | neural cell adhesion molecule 1                                    | Plasma Membrane     | other                      |
| NCOA7    | NCOA7    | nuclear receptor coactivator 7                                     | Nucleus             | transcription regulator    |
| NDRG2    | NDRG2    | NDRG family member 2                                               | Cytoplasm           | other                      |
| NFIA     | NFIA     | nuclear factor I/A                                                 | Nucleus             | transcription regulator    |
| NGFRAP1  | NGFRAP1  | nerve growth factor receptor (TNFRSF16) associated protein 1       | Cytoplasm           | other                      |
| NPR2     | NPR2     | natriuretic peptide receptor 2                                     | Plasma Membrane     | G-protein coupled receptor |
| NSMAF    | NSMAF    | neutral sphingomyelinase activation associated factor              | Cytoplasm           | other                      |
| NXF1     | NXF1     | nuclear RNA export factor 1                                        | Nucleus             | transporter                |
| OGN      | OGN      | osteo glycin                                                       | Extracellular Space | growth factor              |
| OGT      | OGT      | O-linked N-acetylglucosamine (GlcNAc) transferase                  | Cytoplasm           | enzyme                     |
| OTUD5    | OTUD5    | OTU deubiquitinase 5                                               | Cytoplasm           | enzyme                     |
| PAFAH1B1 | PAFAH1B1 | platelet activating factor acetylhydrolase 1b regulatory subunit 1 | Cytoplasm           | enzyme                     |
| PCYOX1   | PCYOX1   | prenylcysteine oxidase 1                                           | Cytoplasm           | enzyme                     |
| PLLP     | PLLP     | plasmolipin                                                        | Plasma Membrane     | transporter                |
| PRDX1    | PRDX1    | peroxiredoxin 1                                                    | Cytoplasm           | enzyme                     |
| PRDX3    | PRDX3    | peroxiredoxin 3                                                    | Cytoplasm           | enzyme                     |
| PRKAR1A  | PRKAR1A  | protein kinase, cAMP-dependent, regulatory subunit type I alpha    | Cytoplasm           | kinase                     |
| PTEN     | PTEN     | phosphatase and tensin homolog                                     | Cytoplasm           | phosphatase                |
| RAB34    | RAB34    | RAB34, member RAS oncogene family                                  | Cytoplasm           | enzyme                     |
| RAP1B    | RAP1B    | RAP1B, member of RAS oncogene family                               | Cytoplasm           | enzyme                     |
| RMND5A   | RMND5A   | required for meiotic nuclear division 5 homolog A                  | Nucleus             | other                      |

|           |           |                                                                                |                     |                         |
|-----------|-----------|--------------------------------------------------------------------------------|---------------------|-------------------------|
| RNF130    | RNF130    | ring finger protein 130                                                        | Cytoplasm           | peptidase               |
| RPL27     | RPL27     | ribosomal protein L27                                                          | Cytoplasm           | other                   |
| RPL39     | RPL39     | ribosomal protein L39                                                          | Cytoplasm           | other                   |
| RPS23     | RPS23     | ribosomal protein S23                                                          | Cytoplasm           | translation regulator   |
| RPS27A    | RPS27A    | ribosomal protein S27a                                                         | Cytoplasm           | other                   |
| RWDD4     | RWDD4     | RWD domain containing 4                                                        | Other               | other                   |
| SAT1      | SAT1      | spermidine/spermine N1-acetyltransferase 1                                     | Cytoplasm           | enzyme                  |
| SC5D      | SC5D      | sterol-C5-desaturase                                                           | Cytoplasm           | enzyme                  |
| SEC11A    | SEC11A    | SEC11 homolog A, signal peptidase complex subunit                              | Cytoplasm           | peptidase               |
| SH3PXD2B  | SH3PXD2B  | SH3 and PX domains 2B                                                          | Cytoplasm           | other                   |
| SLC25A25  | SLC25A25  | solute carrier family 25 (mitochondrial carrier; phosphate carrier), member 25 | Cytoplasm           | transporter             |
| SLC35D2   | SLC35D2   | solute carrier family 35 (UDP-GlcNAc/UDP-glucose transporter), member D2       | Cytoplasm           | transporter             |
| SLC35G3   | SLC35G3   | solute carrier family 35 member G3                                             | Other               | enzyme                  |
| SLC38A2   | SLC38A2   | solute carrier family 38 member 2                                              | Plasma Membrane     | transporter             |
| FAM178A   | SLF2      | SMC5-SMC6 complex localization factor 2                                        | Extracellular Space | other                   |
| SMIM4     | SMIM4     | small integral membrane protein 4                                              | Cytoplasm           | other                   |
| SNX15     | SNX15     | sorting nexin 15                                                               | Cytoplasm           | transporter             |
| SOCS2     | SOCS2     | suppressor of cytokine signaling 2                                             | Cytoplasm           | other                   |
| SOCS3     | SOCS3     | suppressor of cytokine signaling 3                                             | Cytoplasm           | phosphatase             |
| SOD1      | SOD1      | superoxide dismutase 1, soluble                                                | Cytoplasm           | enzyme                  |
| SPARCL1   | SPARCL1   | SPARC like 1                                                                   | Extracellular Space | other                   |
| SPTBN1    | SPTBN1    | spectrin beta, non-erythrocytic 1                                              | Plasma Membrane     | other                   |
| SRSF5     | SRSF5     | serine/arginine-rich splicing factor 5                                         | Nucleus             | other                   |
| TECR      | TECR      | trans-2,3-enoyl-CoA reductase                                                  | Plasma Membrane     | enzyme                  |
| TFB1M     | TFB1M     | transcription factor B1, mitochondrial                                         | Cytoplasm           | transcription regulator |
| TIMP3     | TIMP3     | TIMP metalloproteinase inhibitor 3                                             | Extracellular Space | other                   |
| TNFAIP3   | TNFAIP3   | TNF alpha induced protein 3                                                    | Nucleus             | enzyme                  |
| TNFRSF10B | TNFRSF10B | tumor necrosis factor receptor superfamily member 10b                          | Plasma Membrane     | transmembrane receptor  |
| TSC22D3   | TSC22D3   | TSC22 domain family member 3                                                   | Nucleus             | transcription regulator |
| TSPAN5    | TSPAN5    | tetraspanin 5                                                                  | Plasma Membrane     | other                   |
| TUBA1A    | TUBA1A    | tubulin alpha 1a                                                               | Cytoplasm           | other                   |
| VMP1      | VMP1      | vacuole membrane protein 1                                                     | Plasma Membrane     | other                   |
| WASF3     | WASF3     | WAS protein family member 3                                                    | Cytoplasm           | other                   |
| WISP2     | WISP2     | WNT1 inducible signaling pathway protein 2                                     | Extracellular Space | growth factor           |

Supplementary Table S5. Genes down-regulated in both oligospermic and azoospermic patients

| ID | Symbol | Entrez Gene Name | Location | Type(s) |
|----|--------|------------------|----------|---------|
|----|--------|------------------|----------|---------|

|         |         |                                                                  |                     |                         |
|---------|---------|------------------------------------------------------------------|---------------------|-------------------------|
| ACTR1A  | ACTR1A  | ARP1 actin-related protein 1 homolog A, centractin alpha (yeast) | Cytoplasm           | other                   |
| BDH1    | BDH1    | 3-hydroxybutyrate dehydrogenase, type 1                          | Cytoplasm           | enzyme                  |
| C9orf43 | C9orf43 | chromosome 9 open reading frame 43                               | Other               | other                   |
| CKLF    | CKLF    | chemokine-like factor                                            | Extracellular Space | cytokine                |
| CMC2    | CMC2    | C-x(9)-C motif containing 2                                      | Cytoplasm           | other                   |
| CUL2    | CUL2    | cullin 2                                                         | Nucleus             | enzyme                  |
| CYC1    | CYC1    | cytochrome c-1                                                   | Cytoplasm           | enzyme                  |
| EIF6    | EIF6    | eukaryotic translation initiation factor 6                       | Cytoplasm           | translation regulator   |
| FANK1   | FANK1   | fibronectin type III and ankyrin repeat domains 1                | Nucleus             | transcription regulator |
| GALE    | GALE    | UDP-galactose-4-epimerase                                        | Cytoplasm           | enzyme                  |
| GOSR1   | GOSR1   | golgi SNAP receptor complex member 1                             | Cytoplasm           | transporter             |
| GPN1    | GPN1    | GPN-loop GTPase 1                                                | Nucleus             | transcription regulator |
| IL4I1   | IL4I1   | interleukin 4 induced 1                                          | Cytoplasm           | enzyme                  |
| LRFN4   | LRFN4   | leucine rich repeat and fibronectin type III domain containing 4 | Plasma Membrane     | other                   |
| MRPL14  | MRPL14  | mitochondrial ribosomal protein L14                              | Cytoplasm           | other                   |
| NACA    | NACA    | nascent polypeptide-associated complex alpha subunit             | Cytoplasm           | transcription regulator |
| PARP4   | PARP4   | poly(ADP-ribose) polymerase family member 4                      | Cytoplasm           | enzyme                  |
| PPP1CC  | PPP1CC  | protein phosphatase 1, catalytic subunit, gamma isozyme          | Nucleus             | phosphatase             |
| PSMA4   | PSMA4   | proteasome subunit alpha 4                                       | Cytoplasm           | peptidase               |
| PVRL3   | PVRL3   | poliovirus receptor-related 3                                    | Plasma Membrane     | other                   |
| RACGAP1 | RACGAP1 | Rac GTPase activating protein 1                                  | Cytoplasm           | transporter             |
| RAN     | RAN     | RAN, member RAS oncogene family                                  | Nucleus             | enzyme                  |
| REEP4   | REEP4   | receptor accessory protein 4                                     | Cytoplasm           | other                   |
| SEPT7P2 | SEPT7P2 | septin 7 pseudogene 2                                            | Other               | other                   |
| SESN3   | SESN3   | sestrin 3                                                        | Extracellular Space | other                   |
| SLC39A3 | SLC39A3 | solute carrier family 39 (zinc transporter), member 3            | Plasma Membrane     | transporter             |
| SPA17   | SPA17   | sperm autoantigenic protein 17                                   | Plasma Membrane     | other                   |
| SPATA8  | SPATA8  | spermatogenesis associated 8                                     | Other               | other                   |
| SPESP1  | SPESP1  | sperm equatorial segment protein 1                               | Cytoplasm           | other                   |
| SUCLG1  | SUCLG1  | succinate-CoA ligase, alpha subunit                              | Cytoplasm           | enzyme                  |
| TMBIM4  | TMBIM4  | transmembrane BAX inhibitor motif containing 4                   | Nucleus             | other                   |
| TMEM219 | TMEM219 | transmembrane protein 219                                        | Other               | other                   |
| ZFP91   | ZFP91   | ZFP91 zinc finger protein                                        | Nucleus             | transcription regulator |
| ZNF541  | ZNF541  | zinc finger protein 541                                          | Nucleus             | other                   |

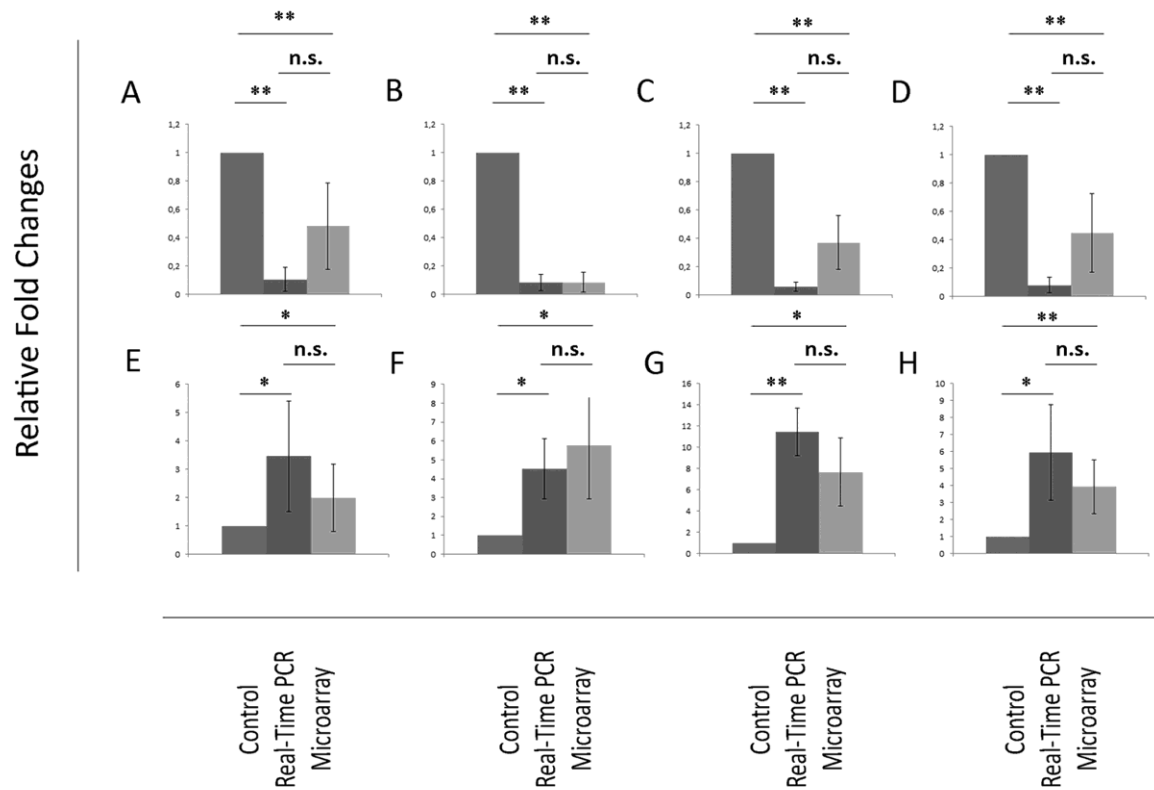

### Supplementary Figure S1. Quantitative Real-Time PCR

qRT-PCR on the 8 selected genes CREM (A), AKAP4 (B), LDHC (C), SPA17 (D), BCL2 (E), GSTA (F), JUN (G), and SOD1 (H). qRT-PCR bars show the relative fold changes calculated by  $\Delta\Delta C_t$  method  $\pm$  SD. T-test was used to assess the p-Value (\*  $p < 0.05$ ; \*\*  $p < 0.005$ ). Each gene was analysed in  $n=3$  KS patients and in the control pool RNA (pool from  $n=3$  control subjects). RT-PCR data confirmed microarray data, showing no significant fold changes differences (n.s., Student's T-test) in all analysed transcripts. CREM, LDHC and SPA17 show slight differences between Microarray and qPCR, but they remain statistically not significant.

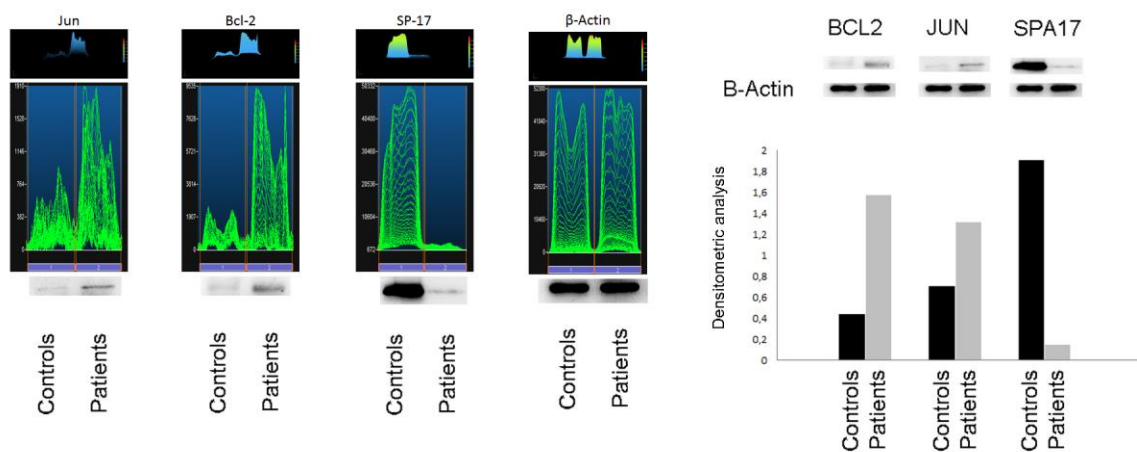

### Supplementary Figure S2. Western blot

Western blot analysis of BCL2, JUN and SPA17 proteins from 3 controls and the 3 patients. Proteins for controls and patients were pooled. Protein levels were corrected against  $\beta$ -actin following a densitometric analysis.
